1 Transcriptional landscape and regulatory roles of small non-coding RNAs in the  
2 oxidative stress response of the haloarchaeon *Haloferax volcanii*

3

4

5

6 Diego R. Gelsinger<sup>a</sup> and Jocelyne DiRuggiero<sup>a#</sup>

7

8

9 Department of Biology, The Johns Hopkins University, Baltimore, Maryland, USA<sup>a</sup>

10

11

12

13 Running Head: Small RNA regulation of oxidative stress in *H. volcanii*

14

15

16

17

18 #Address correspondence to Jocelyne DiRuggiero, [jdiruggiero@jhu.edu](mailto:jdiruggiero@jhu.edu)

19 Diego Rivera Gelsinger, [dgelsin1@jhu.edu](mailto:dgelsin1@jhu.edu)

20

21 **ABSTRACT**

22 *Haloarchaea* in their natural environment are exposed to hyper-salinity, intense  
23 solar radiation, and desiccation, all of which generate high levels of oxidative stress.  
24 Previous work has shown that *Haloarchaea* are an order of magnitude more resistant to  
25 oxidative stress than most mesophilic organisms. Despite this resistance, the pathways  
26 *Haloarchaea* use to respond to oxidative stress damage are similar to that of non-resistant  
27 organisms suggesting that regulatory processes might be key to their robustness. Recently,  
28 small non-coding RNAs (sRNAs) were discovered in *Archaea* under a variety of  
29 environmental conditions. We report here the transcriptional landscape and functional  
30 roles of sRNAs in the regulation of the oxidative stress response of the model  
31 haloarchaeon *Haloferax volcanii*. Thousands of sRNAs, both intergenic and antisense,  
32 were discovered using strand-specific sRNA-seq, comprising around 30% of the  
33 transcriptome during non-challenged and oxidative stress conditions. We identified  
34 hundreds of differentially expressed sRNAs in response to hydrogen peroxide induced  
35 oxidative stress in *H. volcanii*. Targets of antisense sRNAs decreased in expression when  
36 sRNAs were up-regulated indicating that sRNAs are likely playing a negative regulatory  
37 role on mRNA targets at the transcript level. Target enrichment of these antisense sRNAs  
38 included mRNAs involved in transposons mobility, chemotaxis signaling, peptidase  
39 activity, and transcription factors.

40

41 **IMPORTANCE** While a substantial body of experimental work has been done to  
42 uncover functions of sRNAs in gene regulation in Bacteria and Eukarya, the functional  
43 roles of sRNAs in Archaea are still poorly understood. This study is the first to establish

44 the regulatory effects of sRNAs on mRNAs during the oxidative stress response in the  
45 haloarchaeon *Haloferax volcanii*. Our work demonstrates that common principles for the  
46 response to a major cellular stress exist across the 3 domains of life while uncovering  
47 pathways that might be specific to the Archaea. This work also underscores the relevance  
48 of sRNAs in adaptation to extreme environmental conditions.

49

## 50 INTRODUCTION

51 Microbial communities that reside inside halite nodules from Salars in the  
52 Atacama Desert, Chile, are under extreme environmental pressures due to hyper-salinity,  
53 intense solar radiation, and frequent desiccation-hydration cycles, which all generate high  
54 levels of oxidative stress.(1, 2) Oxidative stress occurs when the level of reactive oxygen  
55 species (ROS) produced in cells overwhelms antioxidant defense mechanisms and  
56 damage accumulates.(3) Through metagenomic studies, we found the dominant  
57 populations in these salt rocks to be *Haloarchaea* such as *Haloferax* and  
58 *Halobacterium*.(4) These halophilic microorganisms are members of the third domain of  
59 life, the *Archaea*. *Haloarchaea* have previously been shown to be highly resistant to ROS  
60 damage, withstanding many times what *E. coli* and other radiation-sensitive organisms  
61 can survive.(5-7) The haloarcheon *H. salinarum* has been shown to use a wide-range of  
62 strategies to combat damage from oxidative stress including multiple copies of genomes  
63 (polyploidy) as substrate for DNA repair, functional redundancy of DNA repair and  
64 detoxification enzymes (e.g. catalase), increased cytosolic manganese complexes to  
65 scavenge ROS, and differential regulation of genes in response to stress.(5-9) However,  
66 pathways for DNA repair and protein turnover in *Haloarchaea* are nearly identical to

67 non-resistant bacteria and eukarya suggesting that the regulation of these processes in  
68 response to oxidative stress might be key to their robustness. Previous work with *H.*  
69 *salinarum* oxidative stress gene regulatory networks revealed that a single transcription  
70 factor, RosR, regulates the appropriate dynamic response of nearly 300 genes to reactive  
71 oxygen species stress.(5) This work demonstrated that the oxidative stress response in *H.*  
72 *salinarum* impacted a wide array of cellular processes, engaging at least 50% of all the  
73 genes.(2) These results underline the importance of gene regulation in *Haloarchaea* for  
74 responding to and counteracting the damage caused by oxidative stress.

75 Besides transcription factors, small regulatory RNAs (sRNAs) similarly act as  
76 global gene regulators.(10) Small RNAs (sRNAs) are ubiquitously found in *Bacteria* and  
77 *Eukarya*, playing large-scale roles in gene regulation, transposable element silencing,  
78 defense against disease state, and foreign elements.(11-14) Several types of sRNAs have  
79 been identified in the *Eukarya* (miRNAs, siRNAs, and piRNAs) and they are typically  
80 20-25 nucleotides (nt) long. Their major mode of interaction is through base pairing to  
81 the 3'-untranslated region (UTR) of their target mRNAs, inhibiting translation or  
82 triggering target degradation with associated protein components (Argonautes).(10)  
83 Bacterial sRNAs have been shown to modulate core metabolic functions and stress  
84 related responses, such as nutrient deprivation, by binding target mRNAs and causing  
85 their degradation or preventing translation.(11, 15) Most of the functionally characterized  
86 sRNAs in *Bacteria* bind the 5'-UTR of their target mRNA and are longer than their  
87 eukaryal counterparts, with sizes ranging from 50 to 500 nt. These sRNAs can target  
88 multiple genes, including key transcription factors and regulators. (11, 15, 16) As a  
89 consequence, a single sRNA can modulate the expression of large regulons and thus have

90 a significant effect on metabolic processes. For example, the bacterial sRNA OxyS,  
91 which is dramatically induced by oxidative stress, regulates the expression of about 40  
92 genes and interacts directly with eight target mRNAs.(11)

93 sRNAs have been discovered to be abundant in *Archaea*, more specifically in  
94 *Haloarchaea*, in response to a variety of environmental conditions but the functional  
95 roles of these RNAs still remain poorly understood nor has a link between sRNAs  
96 expression and oxidative stress response been established.(13, 17-24) Only a handful of  
97 studies on sRNAs in hyperthermophiles, methanogens, and the haloarchaeon *Haloferax*  
98 *volcanii* have been reported so far.(13, 17-24) In *H. volcanii* a large number of intergenic-  
99 and antisense-encoded sRNAs, 145 and 45, respectively, were discovered using  
100 microarray in addition to a novel class of sRNAs recently described in eukaryotes, tRNA-  
101 derived fragments (tRFs), and a new study found thousands of sRNAs present in this  
102 organism.(19, 25) In *Sulfolobus solfataricus*, 125 trans-encoded sRNAs and 185 cis-  
103 antisense sRNAs were identified using high-throughput sequencing (HTS), suggesting  
104 that 6.1% of all genes in *S. solfataricus* are associated with sRNAs.(26) A comparative  
105 genome analysis of *Methanosarcina mazei*, *M. bakeri*, and *M. acetivorans* revealed that  
106 30% of the antisense and 21% of the intergenic sRNAs identified were conserved across  
107 the 3 species.(27) Co-immuno-precipitation with the Lsm protein (archaeal Hfq homolog)  
108 was used to “capture” sRNAs.(17) Some *Archaea* contain eukaryotic Argonaute  
109 homologs but their interaction with sRNAs is still yet to be elucidated.(28) All together,  
110 these studies suggest that sRNAs are as widespread and abundant in the *Archaea* as in the  
111 *Bacteria* and *Eukarya*.

112 Target mRNA identification of sRNAs has proven to be difficult within the

113 *Archaea* but a necessary task for uncovering sRNA functionality. RNA-seq in *M. mazei*  
114 cultures, grown under nitrogen starvation conditions, showed the differential expression  
115 of a number of sRNAs in response to nitrogen availability, and allowed for the  
116 identification of the first *in vivo* target for archaeal intergenic sRNAs.(27, 29) The  
117 potential target for sRNA<sub>162</sub> is a bicistronic mRNA encoding for a transcription factor  
118 involved in regulating the switch between carbon sources and a protein of unknown  
119 function.(29) In *Pyrobaculum*, 3 antisense sRNAs were found opposite a ferric uptake  
120 regulator, a triose-phosphate isomerase, and transcription factor B, supporting a potential  
121 role for archaeal antisense sRNA in the regulation of iron, transcription, and core  
122 metabolism.(30) sRNA deletion mutants can be used to identify potential biological  
123 functions and target genes. Deletion strains were successfully generated for *H. volcanii*,  
124 and phenotyping of the sRNAs deletion mutants revealed several severe growth defects  
125 under high temperatures, low salt concentrations, or specific carbon sources.(22, 31)  
126 While these studies revealed that sRNAs likely play essential roles in the physiological  
127 response to environmental challenges in the *Archaea*, the functional roles and  
128 mechanisms of action of these important post-transcriptional regulators still remain  
129 unknown. Furthermore, no work has been done to investigate archaeal sRNAs in  
130 response to oxidative stress, a universal and frequent stressor in all domains of life that  
131 results in extensive cellular damage. In order to determine the impact of sRNAs during  
132 the oxidative stress response, we assessed the *H. volcanii* transcriptional landscape during  
133 non-challenged and oxidative stress conditions using comparative strand-specific small  
134 RNA-sequencing (sRNA-seq).

135

136 **RESULTS**

137 To identify globally small non-coding RNAs differentially expressed in response to  
138 oxidative stress in *H. volcanii*, we exposed 5 replicate cultures of *H. volcanii* to 2 mM  
139 H<sub>2</sub>O<sub>2</sub>, a dose that resulted in the survival of 80% of the cells (**Fig S1**). RNA from these  
140 H<sub>2</sub>O<sub>2</sub> treated cultures, and from non-challenged cultures (controls), were sequenced using  
141 a strand-specific size-selected sRNA library preparation essential for sRNA discovery.  
142 **Small non-coding RNA discovery in *H. volcanii*.** We obtained a total of 137 million  
143 sequence reads (41 Gb), across all replicates and conditions. Following quality control  
144 and reference-based read mapping, we intersected the mapped reads against the *H.*  
145 *volcanii* reference genome to discover sRNA transcripts that we classified as antisense  
146 (overlapping a gene and/or its regulatory elements on the opposite strand) (**Fig 1a**) and  
147 intergenic (non-coding region between two genes) (**Fig 1b**). These novel transcripts were  
148 50 to 1,000 nucleotides (nt) in length and represented 35 to 40% of the total  
149 transcriptome (**Table S1**). The sRNAs were validated using two in-silico approaches, as  
150 described above, and the majority of sRNAs (>90%) passed our validation parameters.  
151 Analyzing the upstream regions of sRNAs enabled the discovery that 30% of sRNAs  
152 contained both a BRE and TATA-box with centroids at -38 and -29 nucleotides (**Fig. S2**).  
153 Using less conservative parameters (-3, +3 nucleotides) for BRE and TATA-box  
154 centroids resulted in 70% of sRNAs containing transcriptional motifs.  
155 **Non-coding sRNA characterization in *H. volcanii* during non-challenge conditions.**  
156 Normalized expression values in RNA-seq analyses are often reported as Reads or  
157 Fragments Per Kilobase of transcript per Million mapped reads (RPKM/FPKM).  
158 However, RPKM/FPKM have been shown to be inconsistent for comparison between

159 samples (due to transcript length) and another expression value, transcripts per million  
160 (TPM), was found preferable for comparison because it is independent of mean expressed  
161 transcript length.(32-35) Due to the generally smaller length of sRNA transcripts and  
162 variability in size, we chose to use TPM in our analysis to minimize transcript length bias.  
163 *H. volcanii* grown under non-challenged conditions (42°C, complex media) expressed a  
164 total of 2,577 sRNAs after quality control (transcripts per million (TPM) >0) (**Table S1**),  
165 ranging from 49 to 1,000 nucleotides in size and with an average length of 373 nt. A  
166 majority of these sRNAs, 2,493 sRNAs (97%), were antisense to coding-regions (**Fig 2**).  
167 Three of the sRNAs were antisense to CRISPR arrays, suggesting their role in regulating  
168 CRISPR systems. The *H. volcanii* H53 auxotroph genome is 4 Mbp and contains 4,130  
169 genes. The genome is comprised of a chromosome stably integrated with plasmid pHV4,  
170 2 plasmids (pHV1, pHV3), and has been cured of plasmid pHV2. A majority of sRNAs  
171 (68%) were encoded on the chromosome and integrated plasmid pHV4 (18%). No sRNA  
172 encoded on plasmid pHV2 were found, as expected, while sRNAs were encoded on the  
173 remaining plasmids pHV1 (2%) and pHV3 (12%).

174         The average expression of the sRNAs was 22.1 TPM. Relative to mRNA  
175 expression levels (average: 254.8 TPM), the expression of the sRNAs was on average an  
176 order of magnitude lower. A comparison of the distribution of expression levels between  
177 sRNAs and mRNAs further confirmed that a majority of sRNAs was more lowly  
178 expressed than mRNAs. Of the discovered sRNAs, 75% had expression values less than  
179 or equal to 1 TPM (**Figure S3**), 5% had expression levels similar to that of mRNAs,  
180 (TPM >20), and 22 had robust expression levels with TPMs ranging from 100 to 700.  
181 Lastly, 2 sRNAs around 150 nucleotides in size exhibited extremely high expression



182 level with TPMs of 14,000 and 460,000, respectively. Transcript length did not correlate  
183 with expression levels, indicating that the low expression of sRNAs observed was not an  
184 artifact of sequencing (i.e. longer transcripts receiving more read coverage thus skewing  
185 coverage based on length) (**Figure S4**). We found that 4 of the top 5 most highly  
186 expressed sRNAs (TPM >150) were located in intergenic regions.

187 Putative mRNA targets for the most highly expressed antisense sRNAs were  
188 identified as the *cis*-mRNA encoded on the opposite strand with a minimum overlap of  
189 25 nucleotides. These targets included an IS4 Family Transposase, ATP—cob(D)alamin  
190 adenosyltransferase, glycine dehydrogenase aminomethyltransferase, transducer protein  
191 Htr36, pyridoxamine 5'-phosphate oxidase, XerC/D integrase, deoxyhypusine synthase,  
192 and protein translocase TatA. We do not report putative targets for intergenic sRNA  
193 because of the inherent difficulty in reliably predicting these targets due to unknown  
194 degrees of complementarity (i.e. gaps in hybridization between an intergenic sRNA and a  
195 mRNA).

196 **Non-coding sRNAs in *H. volcanii* during oxidative stress conditions.** *H. volcanii*  
197 under H<sub>2</sub>O<sub>2</sub>-induced oxidative stress conditions expressed 3,251 sRNAs, a 20% increase  
198 in number of sRNAs compared to the non-challenged conditions (**Fig 2, Table S1**). A  
199 pattern of sRNA distribution similar to that of the non-challenged condition was  
200 observed; more than 90% of sRNAs were antisense and a majority (69%) were encoded  
201 on the main chromosome. A smaller average length of 337 nt was observed. Overall TPM  
202 expression of sRNAs during oxidative stress was similar to the non-challenged state, with  
203 a marked decrease in expression level for the single most highly expressed sRNA (non-  
204 challenged: 40926.9 TPM, H<sub>2</sub>O<sub>2</sub> : 16158.6 TPM), which was an intergenic sRNA.

205 Putative targets for the most highly expressed antisense sRNAs included the 16S rRNA  
206 genes (two sRNAs), an IS4 transposase, an MBL fold hydrolase, transducer protein Htr36,  
207 pyridoxamine 5'-phosphate oxidase, and a stomatin-prohibitin-like protein. Of the most  
208 highly expressed sRNAs, 3 targeted the same mRNAs during both the non-challenged  
209 and oxidative stress conditions. These mRNAs encoded for an IS4 family transposase,  
210 transducer protein Htr36, and pyridoxamine 5'-phosphate oxidase.

211 **Regulatory effects and differential expression of sRNAs during oxidative stress.** To  
212 investigate the regulatory effects sRNAs on their target mRNAs, we compared the  
213 expression levels (TPM) of the most highly expressed antisense sRNAs (TPM>50)  
214 against the *in silico* determined mRNA targets. We found that the expression of these  
215 putative mRNA targets was always lower than that of the sRNA ( $p \leq 0.05$ ), for both  
216 experimental conditions, with the exception of the sRNAs targeting the 16S rRNA gene  
217 (**Fig 3a, Table S1**). This was in contrast to the overall trend in expression levels between  
218 sRNAs and mRNAs we reported in **FigS3**, suggesting that the most highly expressed  
219 sRNAs may lower the expression of their mRNA targets. When looking at sRNAs with  
220 lower expression (10 to 1 TPM) we found that not all but many of these sRNAs had  
221 expression equal to or higher than the target mRNA indicating a similar regulatory effect.  
222 An example of this negative regulatory effect was seen in the antisense sRNA targeting  
223 the IS4 family transposase, which had increased expression during oxidative stress  
224 compared to the non-challenged state (H<sub>2</sub>O<sub>2</sub>: 1382.9 TPM, non-challenged: 590 TPM)  
225 and, correspondingly, the IS4 family transposase mRNA had decreased expression during  
226 oxidative stress (H<sub>2</sub>O<sub>2</sub>: 1.2 TPM, non-challenged 2.7 TPM). The other two sRNAs had  
227 increased expression during non-challenged conditions compared to oxidative stress

228 conditions (non-challenged: 369.4; 312.5 TPM, H<sub>2</sub>O<sub>2</sub>: 244.9; 165 TPM) with a similar  
229 trend of target mRNA expression decreasing (non-challenged: 3.9; 1.1 TPM, H<sub>2</sub>O<sub>2</sub>: 6.7,  
230 5.4 TPM).

231 To further investigate this negative regulatory relationship between sRNAs and  
232 mRNA targets we probed for differentially expressed sRNAs between the non-challenged  
233 and the oxidative stress conditions. Candidate sRNAs were considered significantly up-  
234 or down-regulated by oxidative stress using a False Discovery Rate (FDR) of less than  
235 5%. Using this statistical framework, we identified a core set of differentially expressed  
236 sRNAs specific to oxidative stress. Both intergenic and antisense sRNAs were  
237 differentially expressed. Of the intergenic sRNAs, 55 were significantly differentially  
238 expressed, with 27 up-regulated and 28 down-regulated (**Fig S5, Table S2**). All up-  
239 regulated intergenic sRNAs had greater than or equal to 1.3 log<sub>2</sub>-fold change increase in  
240 expression during oxidative stress, with the most up-regulated intergenic sRNA having a  
241 4.3 log<sub>2</sub>-fold change increase. A few down-regulated intergenic sRNAs had small fold  
242 changes in expression (<1 log<sub>2</sub>-fold change) but most exhibited robust down-regulation (-  
243 3.2 log<sub>2</sub>-fold change). A total of 274 antisense sRNAs were either up-regulated and  
244 down-regulated during oxidative stress, indicating two populations of antisense sRNAs  
245 (**Fig 3b, Table S3**). Seventeen percent (46 sRNAs) of these differentially expressed  
246 sRNAs demonstrated a fold-change in expression of 2 or greater; the most up-regulated  
247 sRNA had a log<sub>2</sub>-fold change of 5.3 and the most down-regulated sRNA had a log<sub>2</sub>-fold  
248 change of -3.6, indicating a role in the cellular response to oxidative stress. Twice the  
249 number of antisense sRNAs were up-regulated with a fold-change in expression of 2 or  
250 greater (31) compared to down-regulated (15). We then compared differential expression

251 levels between antisense sRNAs and their putative mRNA targets (no putative targets  
252 could be reliably identified *in silico* for intergenic sRNAs) and found that, in most  
253 instances, up-regulated antisense sRNAs had putative mRNA targets that were down-  
254 regulated during oxidative stress (**Fig 3b**). For example, during oxidative stress, 14 up-  
255 regulated antisense sRNAs targeted transposase mRNAs and each of the cognate  
256 transposase mRNAs were found to be down-regulated (**Fig 3c**). Furthermore, only a  
257 small subset of down-regulated antisense sRNAs had their mRNA target up-regulated  
258 during oxidative stress, while most of the mRNA targets were also down-regulated (**Fig**  
259 **3b and d**).

260 Oxidative-stress responsive antisense sRNAs were bioinformatically predicted to  
261 overlap both the 5' and 3' UTRs of mRNAs indicating a hybrid system between Eukarya  
262 (3' UTR-binding) and Bacteria (5' UTR-binding) sRNA regulatory systems (**Fig 4**). We  
263 found that 7% of antisense sRNAs overlap at the 5' UTR and 26% overlapping at the 3'  
264 UTR. However, the majority of the antisense sRNAs (67%) were found to overlap the  
265 coding sequence (CDS) of mRNAs rather than targeting the UTRs, which has not been  
266 previously reported (**Fig 4**). Using Northern blots, we recapitulated the *in vivo* differential  
267 expression patterns of selected candidate sRNAs, further confirming transcript size and  
268 differential expression levels for oxidative stress, even for the most lowly expressed  
269 sRNA candidate (1 TPM) (**Fig 5a and 5b**). We also showed that the strandedness (the  
270 strand on which the sRNA was encoded) predicted by our sRNA-seq analysis was  
271 confirmed by our *in vivo* data using oligo probe northern blotting of 5' UTR, 3' UTR,  
272 CDS antisense sRNAs, and intergenic sRNAs (**Fig 5b**).

273           **Target Enrichment of sRNAs.** We identified *in silico* targets for the  
274 differentially expressed oxidative-stress responsive antisense sRNAs. Genes encoded by  
275 the putative target mRNAs were categorized by cellular function using the **archaeal**  
276 **Cluster of Orthologous Genes (arCOGs)** and by pathways using gene ontologies (GO)  
277 from the **Database for Annotation, Visualization and Integrated Discovery (DAVID)**. For  
278 sRNAs up-regulated during H<sub>2</sub>O<sub>2</sub> stress, we found a functional enrichment of target  
279 genes encoding transposases, involved in chemotaxis methyl-receptor signaling and in  
280 transcriptional regulation (transcription factors) (p <0.05). Genes, from many other  
281 pathways that were not enriched, were also the target of antisense sRNAs, including  
282 peptidase activity genes and serine and threonine biosynthesis genes (**Fig 6a**). Twenty  
283 three of these sRNAs targeted transposase genes. Each transposase gene was down-  
284 regulated while their cognate sRNA was up-regulated, and the sRNA was always located  
285 at the 5' UTR of its target. Most transposases belonged to the IS family of transposases  
286 except for one DDE transposase. Three transcription factor families (IclR, ArcR, and  
287 Asn[C]) were also targeted by antisense sRNAs. A functional enrichment gene ontology  
288 analysis found that down-regulated sRNAs target genes were involved in membrane  
289 transport (ABC) transporters and biosynthesis of secondary metabolites, as well as  
290 targeting hydrolases (**Fig 6b**). A significant proportion of enriched targets for both up-  
291 and down-regulated sRNAs were genes encoding hypothetical proteins.

292           **mRNA transcriptional response to oxidative stress in *H. volcanii*.** To  
293 determine the transcriptional landscape of mRNAs during oxidative stress, especially for  
294 mRNAs that were predicted targets of sRNAs, we sequenced rRNA-depleted mRNA-seq  
295 libraries in parallel with the previously described sRNA-seq libraries (derived from the

296 same pool of total RNA). During H<sub>2</sub>O<sub>2</sub>-induced oxidative stress, a fourth of all genes  
297 (1,176) were significantly differentially expressed with a False Discover Rate less than  
298 5% (**Table S4**). Both catalase and superoxide dismutase, known ROS detoxification  
299 enzymes, were up-regulated at the mRNA level thus validating our experimental  
300 approach and characterizing *H. volcanii* response to oxidative stress at the transcriptional  
301 level (**Fig 7**). A GO enrichment analysis (DAVID) was used to identify what pathways  
302 were enriched with differentially expressed genes during oxidative stress. The most  
303 enriched (p<0.05) up-regulated genes were involved in transcription, including various  
304 transcription factor families, all of the RNA polymerase subunit genes, and transcription  
305 initiation factors. Other enriched (p<0.05) up-regulated pathways were involved in iron-  
306 sulfur cluster assembly, DNA topological change (topoisomerase), proteasome, cell redox  
307 homeostasis, histidine metabolism, and 2-oxocarboxylic acid metabolism. The most up-  
308 regulated gene was a reactive intermediate/imine deaminase with a log<sub>2</sub>-fold expression  
309 increase of 6.4. The most enriched (p<0.05) down-regulated genes were Tn5-like IS4  
310 transposases. Other enriched (p<0.05) down-regulated pathways were pyrrolo-quinoline  
311 quinone (PQQ) proteins, tetrapyrrole methyltransferases, and ABC transporters. Only two  
312 genes had down-regulation of less than log<sub>2</sub>-fold change -2, and these were an iron  
313 transporter and lysine 6-monooxygenase.

314

## 315 **DISCUSSION**

316 Previous studies of sRNAs in *Archaea* revealed the abundance of sRNAs within the third  
317 domain of life and have been pivotal in establishing a working hypothesis on archaeal  
318 sRNA functionality. These studies have been limited to (1) microarray studies that do not

319 allow *de novo* discovery of sRNAs, (2) differential RNA-seq approaches (dRNA-seq),  
320 which selects only for primary transcripts and does not provide length (nt) information,  
321 nor expression information (only coverage), and (3) individual sRNAs studies, which do  
322 not give a holistic view of the pathways being regulated within the cell. Using a custom  
323 strand-specific sRNA-seq library preparation and analysis pipeline, we have developed a  
324 method to perform high-throughput analysis of sRNA transcriptional landscape,  
325 expression, regulatory effects, and to identify regulated gene pathways in response to  
326 environmental stressors within the *Archaea*. Through this study, we propose that sRNA-  
327 mediated transcriptional regulation is key in regulating stress responses to environmental  
328 challenges, such as oxidative stress, in the *Haloarchaea*. sRNAs have the potential to  
329 fine-tune the regulation of genes involved in the oxidative stress response resulting in  
330 increased resistance to extreme environmental stressors.

331         The discovery that sRNAs comprised nearly half the total transcriptome of *H.*  
332 *volcanii* and included basal transcriptional promoters, during both non-challenged and  
333 oxidative stress conditions, suggests that sRNAs have an important functional role under  
334 a variety of environmental conditions. We discovered thousands of sRNAs expressed in  
335 *H. volcanii* with the majority being antisense to genes, indicating that antisense  
336 transcription was ubiquitous within the cell. This is in stark contrast to most of the  
337 literature reporting that a majority of sRNAs discovered in *Archaea* were intergenic.(13,  
338 22, 31, 36) This discrepancy is likely due to previous studies being limited to microarray  
339 approaches. Indeed, a recent study using directional RNA-seq (dRNA-seq) to map all  
340 transcription start sites (TSS) in *H. volcanii* found thousands of novel transcript TSS with  
341 1,244 of these TSS being antisense to mRNAs.(24) Most of the TSS (75%) of the sRNAs

342 we discovered in *H. volcanii* had the same TSS (+/- 5 nt) than those found in the dRNA-  
343 seq study by *Babski et al*, 2016 (24), further confirming our results. This underlines the  
344 importance of HTS studies, especially strand-specific RNA-seq such as our study, to  
345 discover the full extent of antisense sRNA expression in *Archaea*.

346 Our finding suggests that *cis*-acting sRNAs may play a larger role than *trans*-  
347 acting sRNAs within the cell but it should not be overlooked that the difficulty in finding  
348 *in silico* targets for intergenic sRNAs, because these sRNAs do not form 100%  
349 complementarity with their targets, might suggest that they have multiple mRNA targets.  
350 Antisense and intergenic sRNAs are broad classifications used in the archaeal small non-  
351 coding RNA field but our data revealed that further classification can be done based on  
352 sRNA-mRNA binding characteristics (5' UTR, 3' UTR, CDS), differential expression,  
353 and regulatory effects. We found that only a small fraction of antisense sRNAs targeted  
354 the 5' UTR of mRNAs, which is in concurrence with work demonstrating that most  
355 mRNAs in *H. volcanii* are leaderless (lacking a 5' UTR). However, further work is  
356 needed to determine whether translational repression via the masking of the Shine-  
357 Dalgarno sequence, as seen in bacterial sRNAs, is the mode of action of these 5' UTR-  
358 binding sRNAs in *Archaea*.(37-39) A majority of the 5' UTR-binding sRNAs targeted  
359 transposons, providing further evidence that they may constitute their own class of  
360 sRNAs. Within this context, 3' UTR-binding sRNAs should also be considered another  
361 class of sRNAs, resembling eukaryotic sRNAs, and likely acting on the degradation of  
362 their target transcript. The majority of the antisense sRNAs we identified in *H. volcanii*  
363 had 100% complementarity within the CDS of their target mRNAs. This is the first report  
364 of such a finding in any domain of life and might constitute an attribute unique of



365 archaeal sRNAs. We could not identified any ‘seed’ binding region for these CDS-  
366 binding sRNAs indicating that they likely have full occupancy upon the mRNA. It is also  
367 worth noting that there were only a few instances (<20 total) where CDS sRNAs  
368 overlapped more than the full length of the target mRNA or overlapped multiple *cis*-  
369 mRNA targets, which might also be unique to Archaea.

370       Most of *H. volcanii* sRNAs had a normalized expression value of 1 TPM or less  
371 meaning that sRNA transcripts were not abundant within the cell. In comparison, most  
372 mRNAs within *H. volcanii* had at least 20 TPM in expression value. Despite this order of  
373 magnitude difference between sRNA (low) and mRNA (high) expression levels, the top  
374 5% of the most highly expressed sRNAs had higher expression compared to their mRNA  
375 target, suggesting a negative regulatory role in sRNA-mRNA interactions (**Fig 3b**). (40-  
376 42) This trend extended to a majority of sRNAs (both non-challenge and oxidative stress  
377 conditions) down to sRNAs with 1 TPM in expression level. Further evidence for a  
378 negative regulatory effect lies with up-regulated sRNAs. Most up-regulated sRNAs had  
379 target mRNAs that were down-regulated indicating sRNAs negatively regulate mRNA  
380 targets at the transcript level. Whether this negative regulation is occurring during  
381 transcription initiation/elongation or if up-regulated sRNAs are causing mRNA  
382 degradation is currently unknown. All the sRNAs targeting transposons at the 5’ UTR  
383 were up-regulated and the transposon mRNA down-regulated (**Fig 3b**), suggesting that  
384 these sRNAs might have a similar mechanistic function. (6, 43, 44) If indeed sRNAs are  
385 negatively regulating their target mRNAs in *H. volcanii*, we expected to find that down-  
386 regulated sRNAs have up-regulated target mRNAs. While some down-regulated sRNA  
387 targets exhibited this pattern, further supporting negative regulation, many mRNA targets

388 were also down-regulated. Alternative hypotheses, reflecting the complexity of  
389 transcriptional regulation in the Archaea, can be formed: (1) some of these sRNAs may  
390 have a positive regulatory effect, such as stabilizing target mRNAs and masking them  
391 from degradation, (2) *trans*-acting intergenic sRNAs might be targeting these mRNAs,  
392 negatively regulating them, and (3) some may have an unknown function.(23) Despite  
393 this, more than twice the number of up-regulated antisense sRNAs (31) had a robust log-  
394 fold change ( $\geq 2$ ) compared to down-regulated sRNAs (15) which suggests that up-  
395 regulating antisense sRNAs to down-regulate mRNA targets is the main strategy during  
396 oxidative stress.

397       The most enriched negatively regulated sRNA targets were transposases,  
398 chemotaxis proteins, and transcription factors. It has been demonstrated that transposons  
399 are opportunistic during stress conditions and can wreak havoc by hopping around in the  
400 genome causing double strand breaks, hence a need to be silenced.(6, 43, 44) A  
401 functional enrichment of IS4 transposon genes being down-regulated during oxidative  
402 stress supports our observation that up-regulated sRNAs negatively regulate transposons  
403 and suggests that transposon activity is tightly regulated during oxidative stress in *H.*  
404 *volcanii*. sRNA-mediated regulation of chemotaxis transducer proteins during oxidative  
405 stress suggests interesting implications in sensing ROS and motility. *H. volcanii*  
406 expresses a flagella homolog named ‘archaella’, which is organized into an operon and is  
407 regulated by a network of regulators called the archaellum regulatory network (arn)  
408 (identified in crenarchaea).(45, 46) The regulation of these motility genes is still under  
409 investigation and so far is restricted to a few examples such as H<sub>2</sub>/nitrogen limitation  
410 conditions in *M. janaschii* and *M. maripaludis*.(46-49) No direct transcriptional

411 regulators of the archaellum have been identified in any euryarchaeota, but the deletion of  
412 archaellin genes, the presence of the H-domain set of type IV pillins, and agl proteins  
413 have been shown to affect the assembly of archaella in *H. volcanii*.(46, 50-52) Integral to  
414 how microorganisms maintain homeostasis in stressful and fluctuating environments are  
415 gene regulatory networks composed of interacting regulatory transcription factors and  
416 their target gene promoters.(53) Our discovery that sRNAs are targeting transcription  
417 factors provides evidence that sRNAs are likely deeply interlaced within complex gene  
418 regulatory networks of *H. volcanii* and these sRNAs are key to maintaining homeostasis  
419 during environmental stress such as oxidative stress. Many mRNA-targets of  
420 differentially regulated sRNAs were hypothetical proteins indicating that important genes  
421 in the oxidative stress response remain to be elucidated.

422         Our whole transcriptional analysis demonstrated that more than a quarter of the  
423 genes (~1100 – 30%) in *H. volcanii* were differentially regulated during constant H<sub>2</sub>O<sub>2</sub>-  
424 induced oxidative stress at ~80% survival, which is in agreement with the transcriptional  
425 response of *H. salinarum* during constant H<sub>2</sub>O<sub>2</sub>- (929 genes – 38%) and paraquat-induced  
426 (1099 genes – 45%) oxidative stress over 2 hours at ~80% survival.(2) This indicates that  
427 transcriptional regulation is crucial in order to mount this oxidative stress response via  
428 gene activation and repression. Two single-stranded DNA binding proteins (RpaB and  
429 RpaC) were found to be required for increased survival of *H. volcanii* to ionizing  
430 radiation (a proxy for desiccation) and UV radiation, stressors that both cause oxidative  
431 stress (54, 55) (DiRuggiero lab, data unpublished). In *H. salinarum*, Rpa operons were  
432 up-regulated during ionizing radiation as well and contributed to resistance.(56, 57) In  
433 conjunction to previous findings, we observed that two of the most up-regulated genes

434 during H<sub>2</sub>O<sub>2</sub> oxidative stress were RpaB and RpaC confirming their role in oxidative  
435 stress resistance in *H. volcanii* and likely other haloarchaea. One gene, a reactive  
436 intermediate/imine deaminase RidA-homolog, was up-regulated orders of magnitude  
437 more than any other gene. The encoded protein is known to be involved in synthesis of  
438 branched-chain amino acids by speeding up the IlvA-catalyzed deamination of threonine  
439 into 2-ketobutyrate.(58, 59) Previous work has shown that in the presence of reactive  
440 chlorine species (RCS), such as HOCl, imine deaminase seemed to inhibit IlvA activity  
441 suggesting that imine deaminase may have a different function in the presence of  
442 RCS.(58, 60) Further studies found that imine deaminase can sense RCS and in doing so  
443 becomes a chaperone that prevents protein aggregation.(58) Reactive oxygen species in  
444 hypersaline environments produce RCS.(61) In addition, ROS causes extensive,  
445 irreversible protein damage such as carbonylation, which in turn causes protein  
446 aggregation.(62, 63) This reactive intermediate/imine deaminase is the most up-regulated  
447 protein-encoding gene, suggesting that it may be playing a similar chaperon role to  
448 prevent protein aggregation, either sensing ROS or RCS produced by H<sub>2</sub>O<sub>2</sub>.(58, 60)

449 This is the first study to report on the transcriptional response of *H. volcanii* to  
450 oxidative stress and, while we found similar responses to H<sub>2</sub>O<sub>2</sub> exposure than previously  
451 reported for *H. salinarum*.(2), further validating our work and providing evidence that  
452 *Haloarchaea* have evolved similar strategies to survive their environmental stresses, we  
453 also found responses that were unique to *H. volcanii*. Similarities to *H. salinarum* include  
454 the up-regulation of ROS scavenging proteins (catalase, superoxide dismutase), iron  
455 sulfur assembly proteins (SufB, SufD), proteasome genes, indicating high protein turn-  
456 over, and many DNA-repair genes.(2) Most of the down-regulated genes were involved

457 with metabolism, such as sugar/phosphate/peptide ABC transporters, electron carriers  
458 (halocyanin), and TCA cycle enzymes, possibly to halt growth until damage is  
459 repaired.(2, 64). The most down regulated gene was an iron ABC transporter, most likely  
460 to limit further production of ROS via Fenton reactions.(2) Of unique responses to  
461 oxidative stress in *H. volcanii*, we found that all of the RNA polymerase subunits,  
462 transcription elongation factors, and transcription initiation factors were up-regulated in  
463 response to oxidative stress. The increase in sRNAs during oxidative stress could be  
464 attributed to this increase in transcription machinery. The majority of the 30S and 50S  
465 ribosomal subunits were down regulated, in contrast to *H. salinarum*. The up-regulation  
466 of histidine biosynthesis and catabolism into glutamate, and 2-Oxocarboxylic acid  
467 metabolism were unknown to be involved in the oxidative stress response, which further  
468 demonstrates there are still more mechanisms to uncover for oxidative stress resistance.  
469 RosR was identified as a global transcriptional regulator in *H. salinarum* and it strongly  
470 up-regulated during oxidative stress.(5) RosR demonstrated no differential expression to  
471 oxidative stress in *H. volcanii* indicating that it may be playing another role in this  
472 organism. Cell cycle genes (*parA*, *cdc6*) involved in chromosome segregation(65) were  
473 down regulated, further suggesting that division is being arrested (halting growth) in  
474 order to repair damage..

475 In this study, we showed for the first time that small non-coding RNAs are  
476 specifically associated with the oxidative stress response in Archaea. During oxidative  
477 stress, antisense sRNAs were prevalently transcribed, comprising nearly 30% of the  
478 transcriptome of *H. volcanii*, and most up-regulated antisense sRNAs imparted a negative  
479 regulatory effect on target mRNAs. These results support the hypothesis that antisense

480 sRNAs in Archaea behave similarly to *cis*-acting bacterial sRNAs and eukaryotic siRNAs,  
481 which negatively regulate mRNAs by sharing extensive complementarity and facilitating  
482 RNA degradation.(66, 67). The precise mechanism(s) of sRNA-mRNA mediated  
483 regulation remains to be elucidated and in particular whether proteins are required to  
484 complex with sRNAs in order to mediate gene regulation such as in Bacteria (Hfq) and  
485 Eukarya (Ago). We also identified several classes of antisense sRNAs, based on their  
486 mRNA-binding patterns (3' UTR, 5' UTR, and CDS), and showed that CDS-targeting of  
487 mRNAs was the predominant mode of action for sRNA hybridization. Mechanistic  
488 differences between these classes of sRNA still need to be investigated as well as the  
489 regulatory roles of sRNAs in Archaea and their functional importance in adaption to  
490 extreme environments.

491

## 492 **MATERIAL AND METHODS**

493 ***Culture growth conditions.*** *H. volcanii* auxotrophic strain H53 ( $\Delta$ *pyr2*,  $\Delta$ *trpA*)  
494 was used for all experiments. Culturing in liquid and solid media was done in rich  
495 medium (Hv-YPC), at 42°C and with shaking at 220 rpm (Amerix Gyromax 737).(68)  
496 Uracil and tryptophan were added to a final concentration of 50 µg/mL, each.

497 ***Oxidative stress exposure.*** We exposed 5 biological replicates of *H. volcanii*  
498 strain H53 liquid cultures to the oxidative stress agent H<sub>2</sub>O<sub>2</sub>. Initially, cultures were  
499 grown in 80 mL of Hv-YPC under optimal conditions to an OD of 0.4 (mid exponential  
500 phase). To ensure homogeneity, each replicate was subsequently split into two 40 mL  
501 cultures, one used for the non-challenged (control) condition and the other for the  
502 oxidative stress condition. For the latter condition, 2 mM H<sub>2</sub>O<sub>2</sub> (80% survival rate,

503 previously determined) was directly added to the cultures followed by an hour incubation  
504 at 42 °C with shaking at 220 rpm. Cultures were then rapidly cooled down, centrifuged at  
505 5,000 x g for 5 minutes and the pellets resuspended in 18% sea water. The cell  
506 suspensions were then transferred to a 1 mL tube and centrifuged at 6,000 x g for 3  
507 minutes, the pellets were flash frozen and stored at -80 °C until ready for RNA extraction.  
508 Control non-challenged culture replicates were processed in the same manner without the  
509 addition of H<sub>2</sub>O<sub>2</sub>.

510 ***Oxidative stress survival curves.*** Assessment of survival in *H. volcanii* under  
511 oxidative stress conditions was done using microdilution plating as described before.(7)  
512 Counts were averaged and standard deviation calculated between replicates. Survival was  
513 calculated as the number of viable cells following H<sub>2</sub>O<sub>2</sub> treatment divided by the number  
514 of viable untreated cells and graphed with standard error bars.

515 ***RNA extraction.*** Total RNA was extracted using the Zymo Quick-RNA Miniprep  
516 kit with the following modifications: after addition of RNA lysis buffer to the frozen cell  
517 pellets, cells were processed with a 23 G needle and syringe to insure complete cell lysis.  
518 *H. volcanii* liquid culture is slimy and viscous thus to increase cellular lysis a 23 G needle  
519 and syringe was used to break down the cell pellet. Total RNA was then extracted  
520 following the standard kit protocol.

521 ***Small RNA-sequencing library preparation (sRNA-seq).*** Total RNA, for each  
522 biological replicate and condition, was size-selected using denaturing polyacrylamide gel  
523 electrophoresis. 20 µg of total RNA was loaded onto a 7% denaturing urea  
524 polyacrylamide gel (SequaGel, National Diagnostics) in 0.5 x TBE buffer and ran at  
525 constant power of 30 W until bromophenol blue bands reached the bottom of the gel. The

526 gel was stained with SYBR Gold, visualized on a blue light box, and bands in the 50-500  
527 nucleotide range, as indicated by the RNA Century Marker plus ladder (ThermoFisher),  
528 were excised. Small RNAs (sRNA) were eluted by rotating overnight in 1.2 mL 0.3 M  
529 NaCl, ethanol precipitated, and DNase I (NEB) treated (37 °C for 2 hours) as previously  
530 described.(69) Strand-specific libraries were prepared using the SMART-seq Ultralow  
531 RNA input kit (Takara), insert sizes checked with the Bioanalyzer RNA pico kit (Agilent),  
532 and paired-end sequencing (2 x 150 bp) was carried out on the Illumina HiSeq 2500  
533 platform at the Johns Hopkins University Genetic Resources Core Facility (GRCF). Total  
534 RNA was rRNA-depleted using the Illumina Ribo-zero Bacteria kit. Library preparation  
535 and sequencing was as described above, omitting the size-selection by denaturing gel  
536 electrophoresis.

537 ***sRNA- and RNA-seq read quality control and reference-based read mapping.***

538 Assessment of the quality of each sequencing library read was determined using fastqc.  
539 The program trim galore was used with base settings to trim adapter sequences from  
540 reads and to filter out low phred score reads (<20). Short length reads were preserved.  
541 Reads from each replicate were aggregated together per condition to get a set of  
542 consensus sRNAs and were mapped against the *H. volcanii* NCBI refseq genome (taxid  
543 2246; 1 chromosome, 4 plasmids) using the hisat2 aligner with strand-specific options  
544 turned on and splice aware options turned off, paired-end mode.(70)

545 ***sRNA- and RNA-seq transcriptome assembly.*** The reference-based alignments  
546 were assembled into transcriptomes using the program stringtie in order to build full-  
547 length transcripts, calculate coverage and expression values (TPM). The assembly was  
548 guided by a gene annotation file from the *H. volcanii* DS2 (NCBI refseq taxid 2246)



549 genome to build transcripts and annotate them either as a gene or novel transcript.(71) A  
550 minimum distance between reads for transcript assembly was specified at 30 nucleotides.  
551 gffcompare under default options was used to compare the assembled transcriptomes  
552 against the gene annotation file from *H. volcanii* DS2 (NCBI refseq taxid 2246) to  
553 annotate transcripts as genes or non-coding RNA (antisense or intergenic).(72, 73) In  
554 house python scripts were used to bin transcripts that were annotated as genes, transcripts  
555 annotated as antisense (classified as non-coding region opposite from a coding region),  
556 transcripts annotated as intergenic (classified as non-coding region between two coding  
557 regions), and subsequently binned antisense sRNAs as 3' UTR, 5' UTR, or CDS  
558 overlapping.

559 ***sRNA- and RNA-seq differential expression analysis.*** We used a read count-  
560 based differential expression analysis to identify differentially expressed sRNAs during  
561 oxidative stress. The program featureCounts was used to rapidly count reads that map to  
562 the assembled sRNA transcripts (described above).(74) featureCounts was run with  
563 strand-specific options on, paired-end mode on, multi-mapping off.(74) The read counts  
564 were then used in the R differential expression software package DESeq2.(75) Briefly,  
565 read counts were converted into a data matrix and normalized by sequencing depth and  
566 geometric mean. Differential expression was calculated by finding the difference in read  
567 counts between the non-challenged state (control) normalized read counts from the  
568 oxidative stress normalized read counts.(75) The differentially expressed sRNAs were  
569 filtered based on the statistical parameter of False Discovery Rate (FDR) and those that  
570 were equal to or under a FDR of 5% were classified as true differentially expressed  
571 sRNAs.

572           ***in silico validation of sRNAs.*** Differentially expressed sRNAs were validated by  
573 two *in silico* methods: 1) Visualization of transcripts, and 2) open reading frame protein  
574 homology search. In the first method, transcriptomes for each replicate and condition  
575 were visualized on the Integrated Genome Viewer (IGV) against the *H. volcanii* (NCBI  
576 refseq taxid 2246) genome and annotation.(76) The sRNA transcript coordinates were  
577 used to locate putative sRNAs and if it was found within an operon it was eliminated  
578 from further analysis. In the second method, blastx (default parameters) was used to  
579 search for protein and domain homology for each sRNA and those that had significant  
580 homology with known proteins or domains were eliminated from further analysis.(77)

581           ***Regulatory element motif identification of sRNAs.*** 100 nucleotides upstream and  
582 downstream from the sRNA transcript start and stop coordinates were extracted using in  
583 house python scripts. These regions were searched for transcription motifs (BRE, TATA-  
584 box) using both multiple sequence alignments and visualization with WebLogo (default  
585 parameters) and motif searching with MEME and CentriMo (default parameters).(78, 79)

586           ***In vivo validation of sRNAs by Northern Blot analysis.*** 20 µg of total RNA and  
587 P<sup>32</sup> ATP end-labeled Century+ RNA markers were loaded onto 5% denaturing urea  
588 polyacrylamide gels (SequaGel, National Diagnostics) and run at 30 watts for 1.5 hours  
589 to ensure well-spaced gel migration from 50 to 1,000 nucleotides (nt). Gels were  
590 transferred onto Ultra-hyb Nylon membranes and hybridized with 2 types of probes. For  
591 lowly expressed sRNAs, we probed with [ $\gamma$ -P<sup>32</sup>]dATP randomly primed amplicons  
592 generated with custom primers based on sRNA transcript genomic coordinates as  
593 determined by the sRNA-seq *in silico* analysis. Probe primers were at a minimum 10 nt  
594 inwards from the predicted genomic coordinates (start and stop) to ensure accurate

595 transcript detection. Hybridizations were done at 65°C. To determine strandedness of  
596 sRNAs, we used [ $\alpha$ -P<sup>32</sup>]dATP end-labeled oligo probes (20-23 nt) that were antisense to  
597 sRNAs. Hybridizations were at 42°C. The rpl30 protein (HVO\_RS16975) transcript was  
598 used as a loading control for differential expression calculation because it was not  
599 differentially expressed under oxidative stress in this RNA-seq dataset. Differential  
600 expression was calculated using ImageJ.

601 ***Gene Ontology (GO) enrichment analysis of mRNA-targets.*** NCBI gene names  
602 for all mRNA-targets of antisense sRNAs were uploaded into **D**atabase for **A**notation,  
603 **V**isualization and **I**ntegrated Discovery (DAVID) to determine the pathways and gene  
604 ontologies targeted by sRNAs.

605 ***RNA-seq data.*** All raw read and processed data from these experiments are  
606 available at NCBI under BioProject PRJNA407425. Illumina raw sequence data (.fastq)  
607 for each replicate and condition are deposited in NCBI Sequence Read Archive with  
608 accession number SRP117726.

609

## 610 **ACKNOWLEDGEMENT**

611 This work was supported by grant FA9950-14-1-0118 from the AFOSR.

612 We thank Madeline Cassani, Dr. Zhao Zhang, and German Uritskiy for advice  
613 and guidance on sRNA-seq library preparation, Evan Hass and Dr. Vidya Balagopal for  
614 advice on northern blotting, Dr. Jacques Ravel, Mike Humphrys, and David Mohr for  
615 sequencing efforts and technical advice, and Dr. John Kim and Dr. Sarah Woodson for  
616 helpful discussions.

617 **FIGURE LEGENDS**

618 Figure 1: Genome viewer of (A) Antisense sRNAs (*cis*-acting) and (B) Intergenic sRNAs  
619 (*trans*-acting). Paired-end reads (100 bases) were mapped to the *H. volcanii* NCBI  
620 reference genome. Reference genes are marked as black lines with white arrows  
621 indicating their location on the plus strand (>) or minus strand (<). Reads marked in red  
622 are transcribed from the minus strand while blue reads are transcribed from the plus  
623 strand. Untranslated regions were predicted using Rockhopper2 (pink lines). Green lines  
624 mark discovered sRNAs. Coverage plots are in gray.

625

626 Figure 2: Number of sRNAs (total, antisense, and intergenic) discovered during non-  
627 challenged and H<sub>2</sub>O<sub>2</sub> challenged conditions.

628

629 Figure 3: Regulatory effects of differentially expressed sRNAs on their putative mRNA  
630 targets during oxidative stress. (A) Expression (TPM) of sRNAs and their respective  
631 mRNA targets during oxidative stress. Stars indicate a significant difference in  
632 expression between a sRNA and its mRNA target based on a pair-wise student's t-test;  
633 \*p-value ≤ 0.05, \*\*p value ≤ 0.01, and \*\*\* p-value ≤ 0.001. (B) Heatmap of log  
634 transformed fold-change of differentially expressed antisense sRNAs. (C) Differential  
635 expression fold changes of up-regulated sRNAs and their mRNA targets. (D) Differential  
636 expression fold changes of down-regulated sRNAs and their mRNA targets.

637

638 Figure 4: Distribution of binding regions for antisense sRNAs. UTR, untranslated region;  
639 CDS, coding sequence.

640

641 Figure 5: Validation of differentially expressed sRNAs by Northern blots. (A)

642 Representative Northern blot confirming size and differential expression patterns of an

643 intergenic sRNA during oxidative stress. (B) Quantification of Northern blots confirming

644 the expression of lowly expressed sRNAs (random primed labeling) and strand-

645 specificity of sRNAs (oligo labeling). All classes of sRNAs were confirmed: antisense (5'

646 UTR, 3' UTR, CDS) and intergenic sRNAs.

647

648 Figure 6: Gene ontology enrichment analysis identifying the functional classification of

649 gene targets of sRNAs during oxidative stress. (A) Enriched target gene functions for up-

650 regulated sRNAs. (B) Enriched target gene functions for down-regulated sRNAs.

651

652 Figure 7: Distribution of differentially expressed genes during oxidative stress in *H.*

653 *volcanii*. (A) MA-plot of differentially expressed genes; each point represent a gene.

654 Significant (FDR < 5%) differentially expressed sRNAs are labeled in red. Circled points

655 are known ROS scavengers. (B) Gene function for the most up- and down-regulated

656 sRNAs.

657

658

659

660

## 661 REFERENCES

- 662 1. Robinson CK, Wierzchos J, Black C, Crits-Christoph A, Ma B, Ravel J, Ascaso C,  
663 Artieda O, Valea S, Roldan M, Gomez-Silva B, DiRuggiero J. 2015. Microbial  
664 diversity and the presence of algae in halite endolithic communities are correlated  
665 to atmospheric moisture in the hyper-arid zone of the Atacama Desert. *Environ*  
666 *Microbiol* 17:299-315.
- 667 2. Kaur A, Van PT, Busch CR, Robinson CK, Pan M, Pang WL, Reiss D,  
668 DiRuggiero J, Baliga NS. 2010. Coordination of frontline defense mechanisms  
669 under severe oxidative stress. *Mol Syst Biol* 393: doi:10.1038/msb.2010.50.
- 670 3. Imlay JA. 2008. Cellular defenses against superoxide and hydrogen peroxide.  
671 *Annu Rev Biochem* 77:755-76.
- 672 4. Crits-Christoph A, Gelsinger DR, Ma B, Wierzchos J, Ravel J, Ascaso C, Artieda  
673 O, Davila A, DiRuggiero J. 2016. Functional analysis of the archaea, bacteria, and  
674 viruses from a halite endolithic microbial community. *Env Microbiol* 18:2064-  
675 2077. doi: 10.1111/1462-2920.13259.
- 676 5. Sharma K, Gillum N, Boyd JL, Schmid A. 2012. The RosR transcription factor is  
677 required for gene expression dynamics in response to extreme oxidative stress in a  
678 hypersaline-adapted archaeon. *BMC Genomics* 13:351.
- 679 6. Whitehead K, Kish A, Pan M, Kaur A, Reiss DJ, King N, Hohmann L,  
680 DiRuggiero J, Baliga NS. 2006. An integrated systems approach for  
681 understanding cellular responses to gamma radiation. *Mol Syst Biol*  
682 47:doi:10.1038/msb4100091.
- 683 7. Robinson CK, Webb K, Kaur A, Jaruga P, Dizdaroglu M, Baliga NS, Place A,  
684 DiRuggiero J. 2011. A major role for nonenzymatic antioxidant processes in the  
685 radioresistance of *Halobacterium salinarum*. *J Bacteriol* 193:1653-62.
- 686 8. Webb KM, Wu J, Robinson CK, Tomiya N, Lee Y, DiRuggiero J. 2013. Effects  
687 of intracellular Mn on the radiation resistance of the halophilic archaeon  
688 *Halobacterium salinarum*. *Extremophiles* 17:485-497.
- 689 9. Sharma A, Grichenko O, Matrosova VY, Hoeke V, Klimenkova P, Conze IH,  
690 Volpe RP, Tkavcb R, Gostinpar C, Gunde-Cimerman N, DiRuggiero J, Shuryakg  
691 I, Ozarowskih A, Hoffmana BM, Daly MJ. 2017. Across the Tree of Life,  
692 Radiation Resistance is Governed by Antioxidant Mn<sup>2+</sup>, Gauged by  
693 Paramagnetic Resonance. Submitted.
- 694 10. Morris KV MJ. 2014. The rise of regulatory RNA. *Nature Rev Genet* 15:423-437.
- 695 11. Altuvia S, Weinstein-Fischer D, Zhang A, Postow L, Storz G. 1997. A small,  
696 stable RNA induced by oxidative stress: role as a pleiotropic regulator and  
697 antimutator. *Cell* 90:43-53.
- 698 12. Cech TR, Steitz, JA. 2014. The noncoding RNA revolution-trashing old rules to  
699 forge new ones. *Cell* 157:77-94.

- 700 13. Marchfelder A, Fischer S, Brendel J, Stoll B, Maier LK, Jager D, Prasse D,  
701 Plagens A, Schmitz RA, Randau L. 2012. Small RNAs for defence and regulation  
702 in archaea. *Extremophiles* 16:685-96.
- 703 14. Prasse D, Ehlers C, Backofen R, Schmitz RA. 2013. Regulatory RNAs in archaea:  
704 first target identification in *Methanoarchaea*. *Biochem Soc Trans* 41:344-9.
- 705 15. Altuvia S. 2004. Regulatory small RNAs: the key to coordinating global  
706 regulatory circuits. *J Bacteriol* 186:6679-80.
- 707 16. Gottesman S, Storz G. 2011. Bacterial small RNA regulators: versatile roles and  
708 rapidly evolving variations. *Cold Spring Harb Perspect Biol* 3.
- 709 17. Fischer S, Benz J, Spath B, Maier LK, Straub J, Granzow M, Raabe M, Urlaub H,  
710 Hoffmann J, Brutschy B, Allers T, Soppa J, Marchfelder A. 2010. The archaeal  
711 Lsm protein binds to small RNAs. *J Biol Chem* 285:34429-38.
- 712 18. Fischer S, Benz J, Spath B, Jellen-Ritter A, Heyer R, Dorr M, Maier LK, Menzel-  
713 Hobeck C, Lehr M, Jantzer K, Babski J, Soppa J, Marchfelder A. 2011.  
714 Regulatory RNAs in *Haloferax volcanii*. *Biochem Soc Trans* 39:159-62.
- 715 19. Heyer R, Dorr M, Jellen-Ritter A, Spath B, Babski J, Jaschinski K, Soppa J,  
716 Marchfelder A. 2012. High throughput sequencing reveals a plethora of small  
717 RNAs including tRNA derived fragments in *Haloferax volcanii*. *RNA Biol*  
718 9:1011-8.
- 719 20. Schmitz-Streit R, Jäger D, Jellen-Ritter A, Babski J, Soppa J, Marchfelder A.  
720 2011. Archaea employ small RNAs as regulators, p 131-145. *In* Hess WR,  
721 Marchfelder A (ed), *Regulatory RNAs in Prokaryotes*. Springer Verlag, Wien.
- 722 21. Soppa J, Straub J, Brenneis M, Jellen-Ritter A, Heyer R, Fischer S, Granzow M,  
723 Voss B, Hess WR, Tjaden B, Marchfelder A. 2009. Small RNAs of the halophilic  
724 archaeon *Haloferax volcanii*. *Biochem Soc Trans* 37:133-6.
- 725 22. Straub J, Brenneis M, Jellen-Ritter A, Heyer R, Soppa J, Marchfelder A. 2009.  
726 Small RNAs in haloarchaea: identification, differential expression and biological  
727 function. *RNA Biol* 6:281-92.
- 728 23. Prasse D, Förstner KU, Jäger D, Backofen R, Schmitz RA. 2017. sRNA154 a  
729 newly identified regulator of nitrogen fixation in *Methanosarcina mazei* strain  
730 Gö1. *RNA Biol* doi:10.1080/15476286.2017.1306170:1-15.
- 731 24. Babski J, Haas KA, Näther-Schindler D, Pfeiffer F, Förstner KU, Hammelmann  
732 M, Hilker R, Becker A, Sharma CM, Marchfelder A, Soppa J. 2016. Genome-  
733 wide identification of transcriptional start sites in the haloarchaeon *Haloferax*  
734 *volcanii* based on differential RNA-Seq (dRNA-Seq). *BMC Genomics* 17:629.
- 735 25. Gebetsberger J, Zywicki M, Künzi A, Polacek N. 2012. tRNA-Derived Fragments  
736 Target the Ribosome and Function as Regulatory Non-Coding RNA in *Haloferax*  
737 *volcanii*. *Archaea* 2012:11.
- 738 26. Wurtzel O, Sapra R, Chen F, Zhu Y, Simmons BA, Sorek R. 2010. A single-base  
739 resolution map of an archaeal transcriptome. *Genome Res* 20:133-41.
- 740 27. Jager D, Sharma CM, Thomsen J, Ehlers C, Vogel J, Schmitz RA. 2009. Deep  
741 sequencing analysis of the *Methanosarcina mazei* Gö1 transcriptome in response  
742 to nitrogen availability. *Proc Natl Acad Sci U S A* 106:21878-82.
- 743 28. Li Y, Liu, X., Huang, L., Guo, H., Wang, XJ. 2010. Potential coexistence of both  
744 bacterial and eukaryotic small RNA biogenesis and functional related protein  
745 homologs in Archaea. *J Genet Genomics*:493-503.

- 746 29. Jager D, Pernitzsch SR, Richter AS, Backofen R, Sharma CM, Schmitz RA. 2012.  
747 An archaeal sRNA targeting cis- and trans-encoded mRNAs via two distinct  
748 domains. *Nucleic Acids Res* 40:10964-79.
- 749 30. Bernick DL, Dennis PP, Lui LM, Lowe TM. 2012. Diversity of Antisense and  
750 Other Non-Coding RNAs in Archaea Revealed by Comparative Small RNA  
751 Sequencing in Four *Pyrobaculum* Species. *Front Microbiol* 3:231.
- 752 31. Heyer R, Dörr M, Jellen-Ritter A, Späth B, Babski J, Jaschinski K. 2012. High  
753 throughput sequencing reveals a plethora of small RNAs including tRNA derived  
754 fragments in *Haloferax volcanii*. *RNA Biol* 9.
- 755 32. Conesa A, Madrigal P, Tarazona S, Gomez-Cabrero D, Cervera A, McPherson A,  
756 Szcześniak MW, Gaffney DJ, Elo LL, Zhang X, Mortazavi A. 2016. A survey of  
757 best practices for RNA-seq data analysis. *Genome Biol* 17:13.
- 758 33. Li B, Dewey CN. 2011. RSEM: accurate transcript quantification from RNA-Seq  
759 data with or without a reference genome. *BMC Bioinformatics* 12:323-323.
- 760 34. Li B, Ruotti V, Stewart RM, Thomson JA, Dewey CN. 2010. RNA-Seq gene  
761 expression estimation with read mapping uncertainty. *Bioinformatics* 26:493-500.
- 762 35. Wagner GP, Kin K, Lynch VJ. 2012. Measurement of mRNA abundance using  
763 RNA-seq data: RPKM measure is inconsistent among samples. *Theory Biosci*  
764 131:281-285.
- 765 36. Babski J, Maier LK, Heyer R, Jaschinski K, Prasse D, Jäger D. 2014. Small  
766 regulatory RNAs in Archaea. *RNA Biol* 11.
- 767 37. Thomason MK, Storz G. 2010. Bacterial antisense RNAs: How many are there  
768 and what are they doing? *Annu Rev Genet* 44:167-188.
- 769 38. Kawano M, Aravind L, Storz G. 2007. An antisense RNA controls synthesis of an  
770 SOS-induced toxin evolved from an antitoxin. *Mol Microbiol* 64:738-754.
- 771 39. Papenfort K, Vogel J. 2009. Multiple target regulation by small noncoding RNAs  
772 rewires gene expression at the post-transcriptional level. *Res Microbiol* 160:278-  
773 287.
- 774 40. Storz G, Vogel J, Wassarman KM. 2011. Regulation by small RNAs in bacteria:  
775 expanding frontiers. *Mol Cell* 43:880-91.
- 776 41. He L, Hannon GJ. 2004. MicroRNAs: small RNAs with a big role in gene  
777 regulation. *Nat Rev Genet* 5:522-531.
- 778 42. De Lay N, Schu DJ, Gottesman S. 2013. Bacterial Small RNA-based Negative  
779 Regulation: Hfq and Its Accomplices. *J Biol Chem* 288:7996-8003.
- 780 43. Wheeler BS. 2013. Small RNAs, big impact: small RNA pathways in transposon  
781 control and their effect on the host stress response. *Chromosome Res* 21:587-600.
- 782 44. Capy P, Gasperi G, Biemont C, Bazin C. 2000. Stress and transposable elements:  
783 co-evolution or useful parasites? *Heredity* 85:101-106.
- 784 45. Hoffmann L, Schummer A, Reimann J, Haurat MF, Wilson AJ, Beeby M,  
785 Warscheid B, Albers SV. 2017. Expanding the archaeal regulatory network –  
786 the eukaryotic protein kinases ArnC and ArnD influence motility of *Sulfolobus*  
787 *acidocaldarius*. *Microbiologyopen* 6:e00414.
- 788 46. Albers S-V, Jarrell KF. 2015. The archaeal swim: how Archaea swim. *Front*  
789 *Microbiol* 6:23.



- 790 47. Mukhopadhyay B, Johnson EF, Wolfe RS. 2000. A novel pH2 control on the  
791 expression of flagella in the hyperthermophilic strictly hydrogenotrophic  
792 methanarchaeon *Methanococcus jannaschii*. Proc Natl Acad Sci 97:11522-11527.
- 793 48. Hendrickson EL, Liu Y, Rosas-Sandoval G, Porat I, Söll D, Whitman WB, Leigh  
794 JA. 2008. Global Responses of *Methanococcus maripaludis* to Specific Nutrient  
795 Limitations and Growth Rate. J Bacteriol 190:2198-2205.
- 796 49. Xia Q, Wang T, Hendrickson EL, Lie TJ, Hackett M, Leigh JA. 2009.  
797 Quantitative proteomics of nutrient limitation in the hydrogenotrophic  
798 methanogen *Methanococcus maripaludis*. BMC Microbiology 9:149-149.
- 799 50. Esquivel RN, Pohlschroder M. 2014. A conserved type IV pilin signal peptide H-  
800 domain is critical for the post-translational regulation of flagella-dependent  
801 motility. Mol Microbiol 93:494-504.
- 802 51. Tripepi M, Imam S, Pohlschröder M. 2010. *Haloferax volcanii* Flagella Are  
803 Required for Motility but Are Not Involved in PibD-Dependent Surface Adhesion.  
804 J Bacteriol 192:3093-3102.
- 805 52. Tripepi M, You J, Temel S, Önder Ö, Brisson D, Pohlschröder M. 2012. N-  
806 Glycosylation of *Haloferax volcanii* Flagellins Requires Known Agl Proteins and  
807 Is Essential for Biosynthesis of Stable Flagella. J Bacteriol 194:4876-4887.
- 808 53. Darnell CL, Schmid AK. 2015. Systems biology approaches to defining  
809 transcription regulatory networks in halophilic archaea. Methods 86:102-114.
- 810 54. Stroud A, Liddell S, Allers T. 2012. Genetic and Biochemical Identification of a  
811 Novel Single-Stranded DNA-Binding Complex in *Haloferax volcanii*. Front  
812 Microbiol 3:224.
- 813 55. Skowyra A, MacNeill SA. 2012. Identification of essential and non-essential  
814 single-stranded DNA-binding proteins in a model archaeal organism. Nucleic  
815 Acids Res 40:1077-1090.
- 816 56. DeVeaux LC, Iler JA, Smith J, Petrisko J, Wells DP, DasSarma S. 2007.  
817 Extremely Radiation-Resistant Mutants of a Halophilic Archaeon with Increased  
818 Single-Stranded DNA-Binding Protein (RPA) Gene Expression. Radiat Res  
819 168:507-514.
- 820 57. McCready S, Muller JA, Boubriak I, Berquist BR, Ng WL, Dassarma S. 2005.  
821 UV irradiation induces homologous recombination genes in the model archaeon,  
822 *Halobacterium* sp. NRC-1. Saline Syst 1:3.
- 823 58. Müller A, Langklotz S, Lupilova N, Kuhlmann K, Bandow JE, Leichert LIO.  
824 2014. Activation of RidA chaperone function by N-chlorination. Nat Commun  
825 5:5804.
- 826 59. Lambrecht JA, Flynn JM, Downs DM. 2012. Conserved YjgF Protein Family  
827 Deaminates Reactive Enamine/Imine Intermediates of Pyridoxal 5'-Phosphate  
828 (PLP)-dependent Enzyme Reactions. J Biol Chem 287:3454-3461.
- 829 60. Dahl J-U, Gray MJ, Jakob U. 2015. Protein Quality Control under Oxidative  
830 Stress Conditions. J Mol Biol 427:1549-1563.
- 831 61. Stutz J, Ackermann R, Fast JD, Barrie L. 2002. Atmospheric reactive chlorine and  
832 bromine at the Great Salt Lake, Utah. Geophys Res Lett 29:18-1-18-4.
- 833 62. Nyström T. 2005. Role of oxidative carbonylation in protein quality control and  
834 senescence. EMBO J 24:1311-1317.

- 835 63. Suzuki YJ, Carini M, Butterfield DA. 2010. Protein Carbonylation. *Antioxid*  
836 *Redox Signal* 12:323-325.
- 837 64. Scharf B, Engelhard M. 1993. Halocyanin, an archaebacterial blue copper protein  
838 (type I) from *Natronobacterium pharaonis*. *Biochem* 32:12894-12900.
- 839 65. Lindas A-C, Bernander R. 2013. The cell cycle of archaea. *Nat Rev Micro*  
840 11:627-638.
- 841 66. Waters LS, Storz G. 2009. Regulatory RNAs in bacteria. *Cell* 136:615-28.
- 842 67. Mack GS. 2007. MicroRNA gets down to business. *Nat Biotech* 25:631-638.
- 843 68. Dyall-Smith, M. 1998-2009. *Halohandbook* Version 7.2, 2009.144 pages,  
844 including contents, phylogenetic tree, and pictures.
- 845 69. Zhang Z, Theurkauf WE, Weng Z, Zamore PD. 2012. Strand-specific libraries for  
846 high throughput RNA sequencing (RNA-Seq) prepared without poly(A) selection.  
847 *Silence* 3:9.
- 848 70. Kim D, Langmead B, Salzberg SL. 2015. HISAT: a fast spliced aligner with low  
849 memory requirements. *Nat Meth* 12:357-360.
- 850 71. Pertea M, Pertea GM, Antonescu CM, Chang T-C, Mendell JT, Salzberg SL.  
851 2015. StringTie enables improved reconstruction of a transcriptome from RNA-  
852 seq reads. *Nat Biotech* 33:290-295.
- 853 72. GFF utilities: gffcompare. <https://github.com/gperte/gffcompare>
- 854 73. Pertea M, Kim D, Pertea GM, Leek JT, Salzberg SL. 2016. Transcript-level  
855 expression analysis of RNA-seq experiments with HISAT, StringTie and  
856 Ballgown. *Nat Protocols* 11:1650-1667.
- 857 74. Liao Y, Smyth GK, Shi W. 2014. featureCounts: an efficient general purpose  
858 program for assigning sequence reads to genomic features. *Bioinformatics*  
859 30:923-930.
- 860 75. Love MI, Huber W, Anders S. 2014. Moderated estimation of fold change and  
861 dispersion for RNA-seq data with DESeq2. *Genome Biol* 15:550.
- 862 76. Robinson JT, Thorvaldsdottir H, Winckler W, Guttman M, Lander ES, Getz G,  
863 Mesirov JP. 2011. Integrative genomics viewer. *Nat Biotech* 29:24-26.
- 864 77. Altschul SF, Gish W, Miller W, Myers EW, Lipman DJ. 1990. Basic local  
865 alignment search tool. *J Mol Biol* 215:403-410.
- 866 78. Crooks GE, Hon G, Chandonia J-M, Brenner SE. 2004. WebLogo: A Sequence  
867 Logo Generator. *Genome Res* 14:1188-1190.
- 868 79. Bailey TL, Boden M, Buske FA, Frith M, Grant CE, Clementi L, Ren J, Li WW,  
869 Noble WS. 2009. MEME SUITE: tools for motif discovery and searching.  
870 *Nucleic Acids Res* 37:W202-8.  
871

# Figure 1

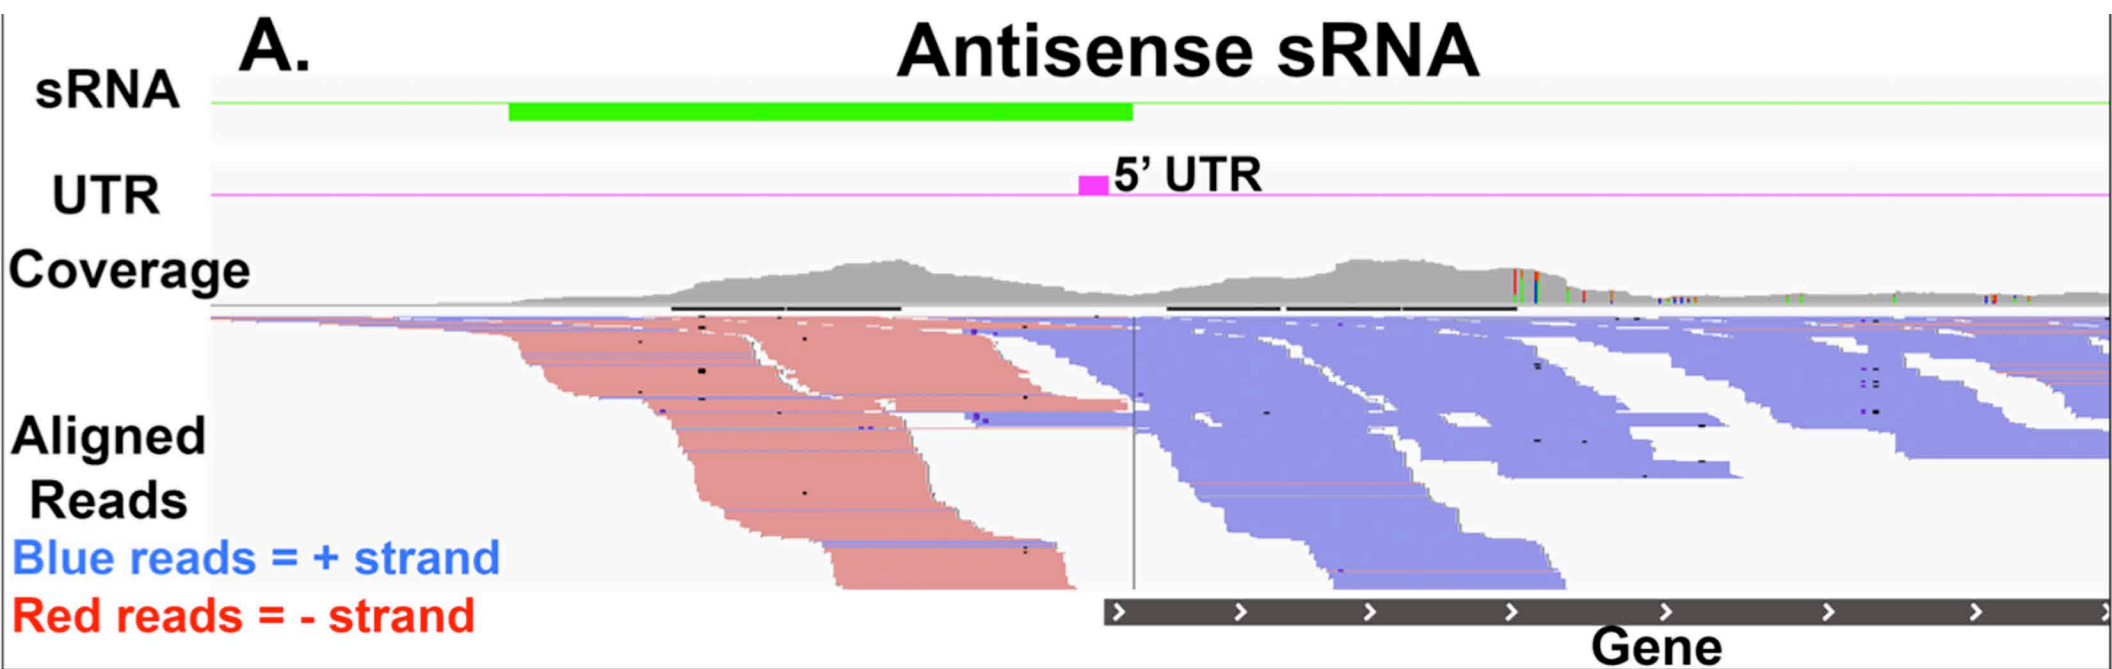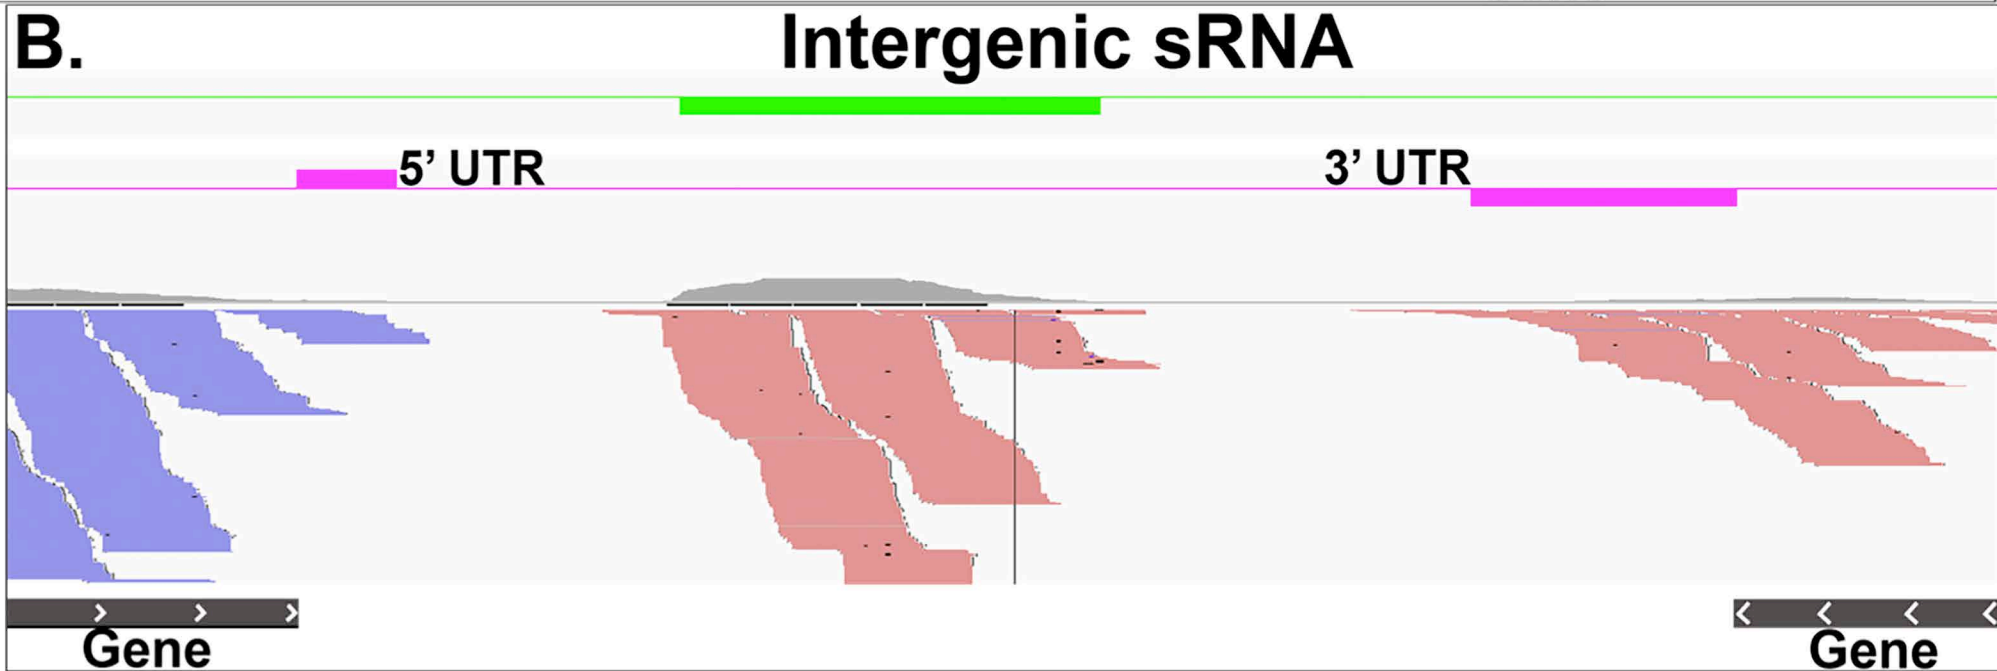

**Figure 2**

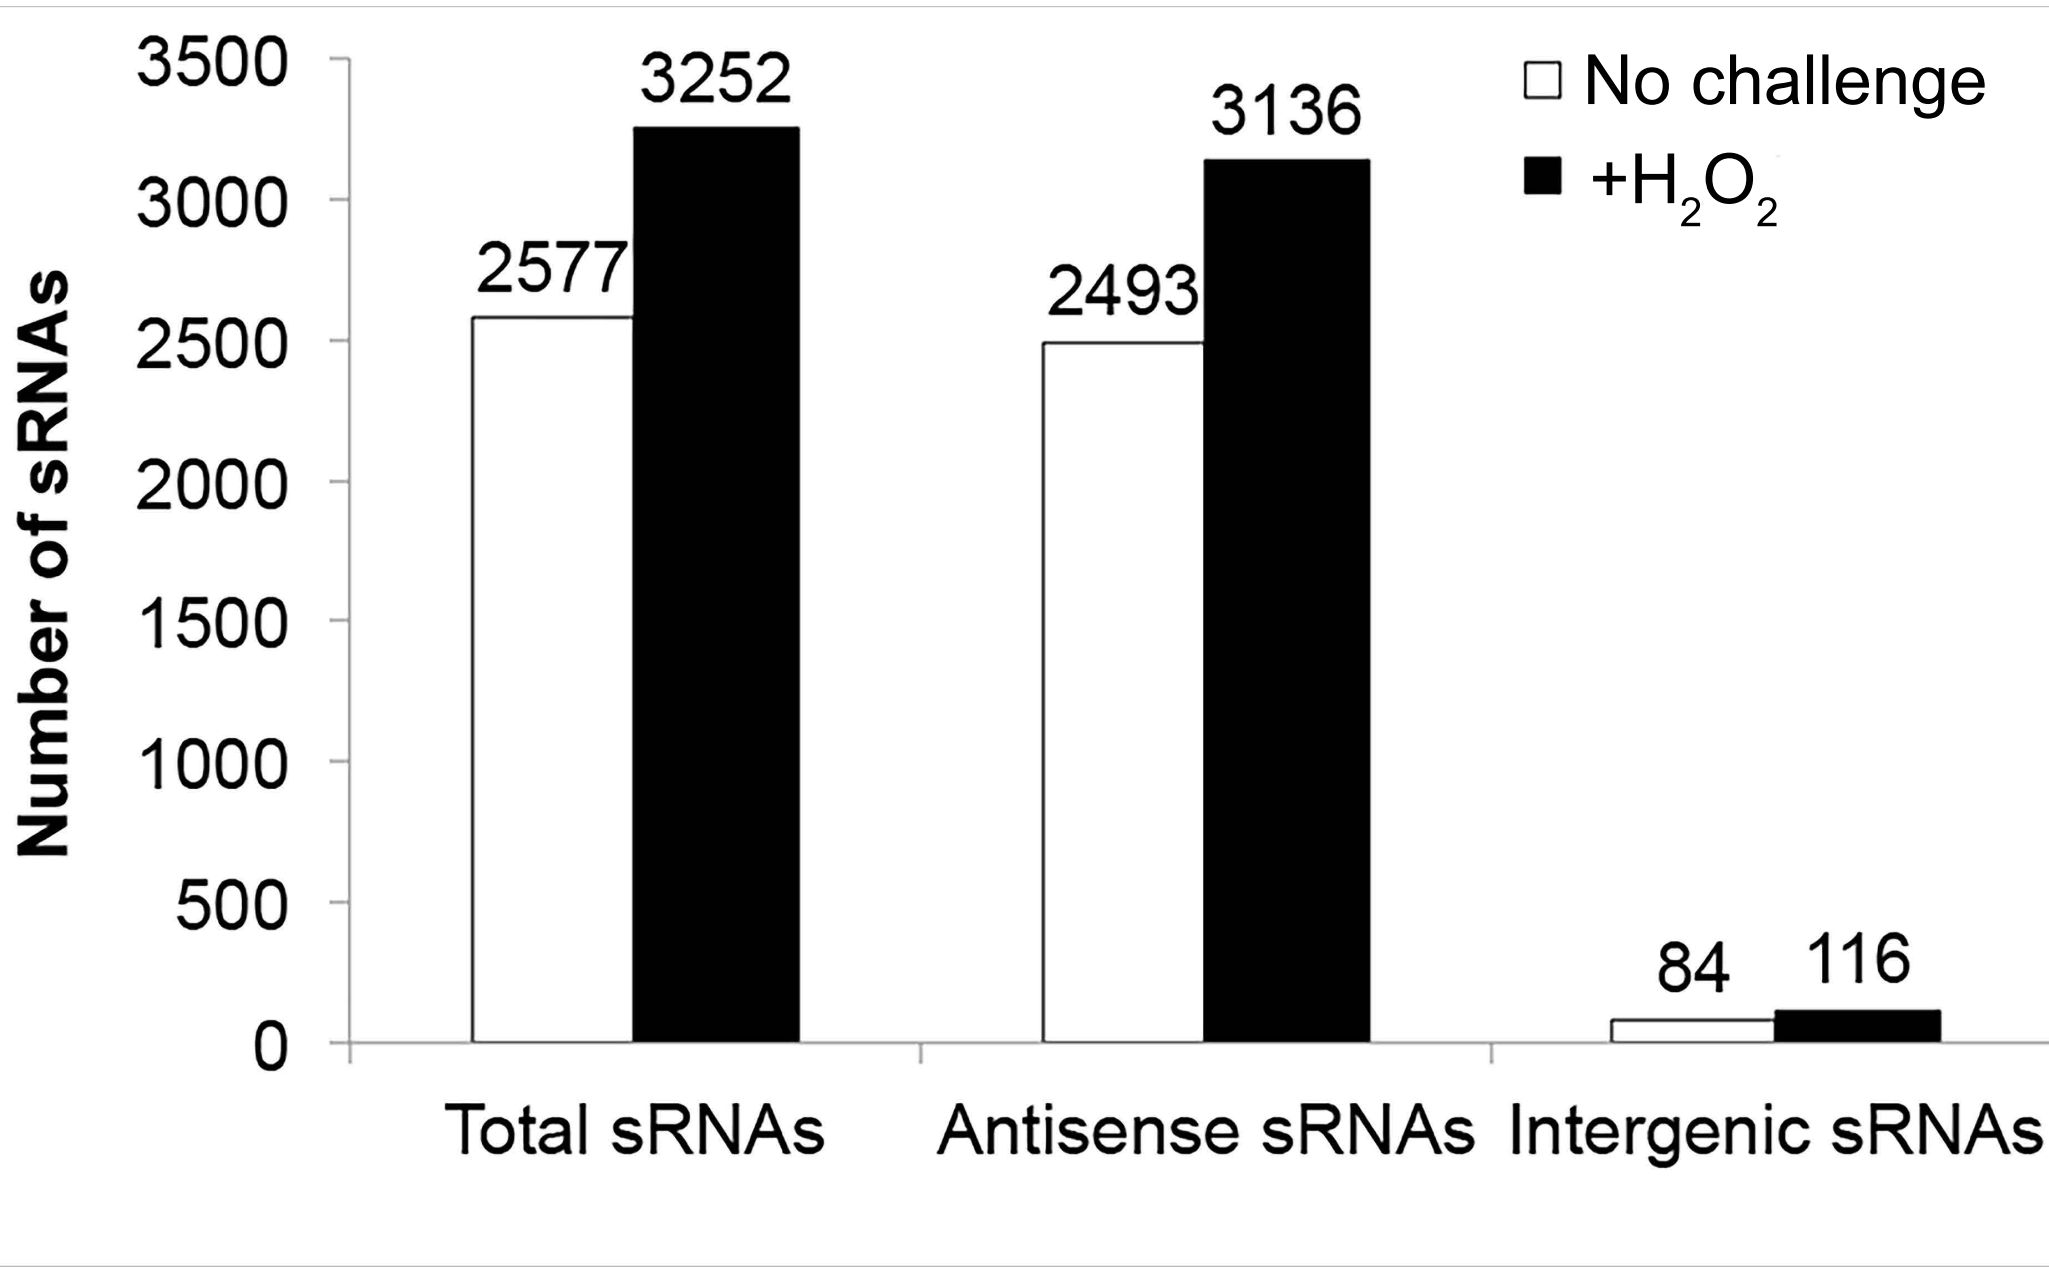

# Figure 3

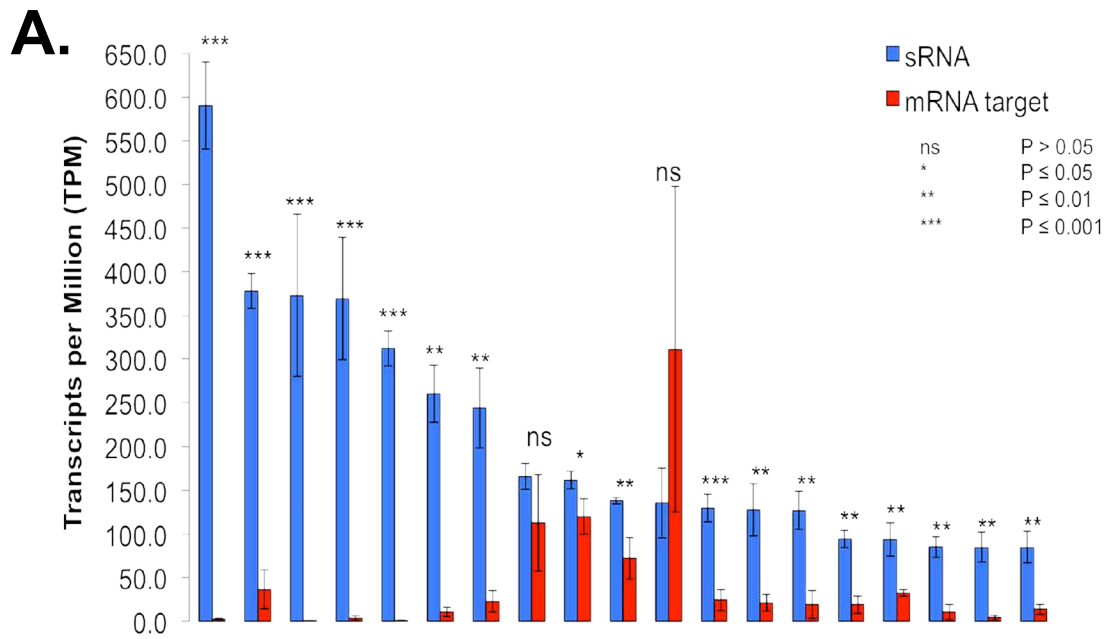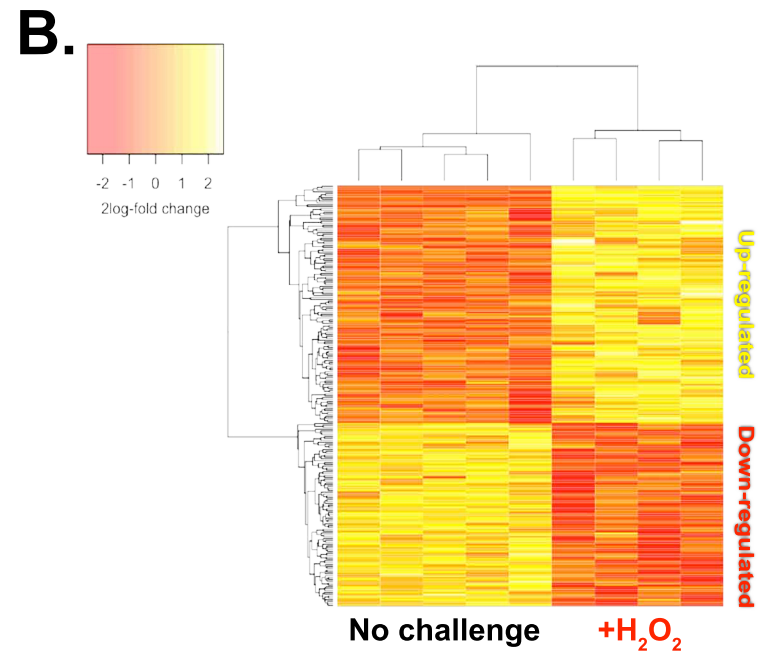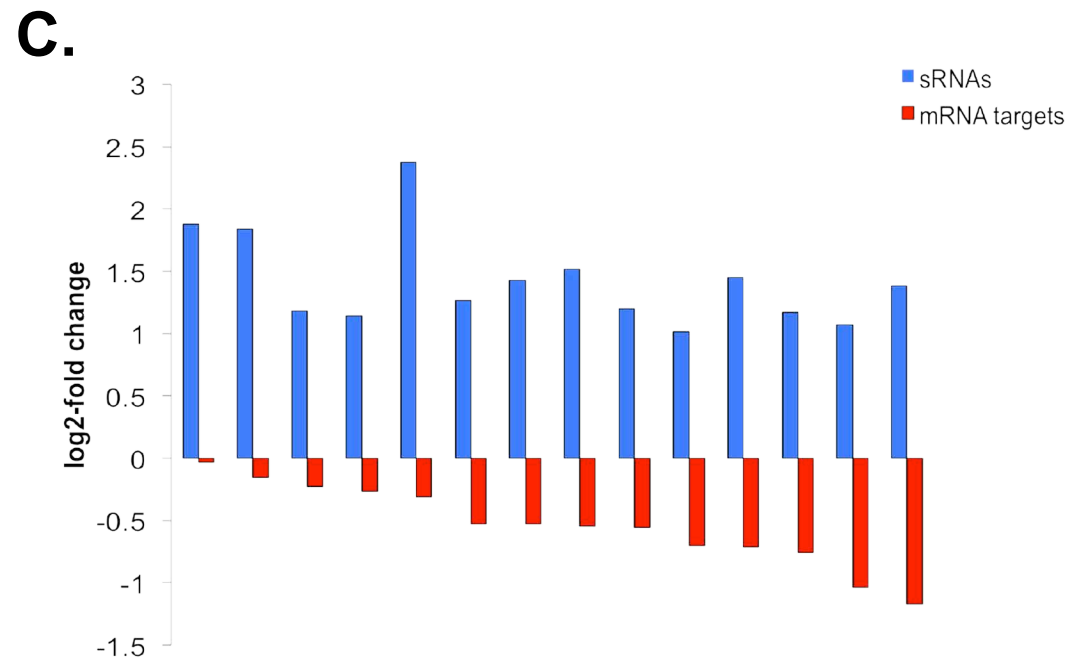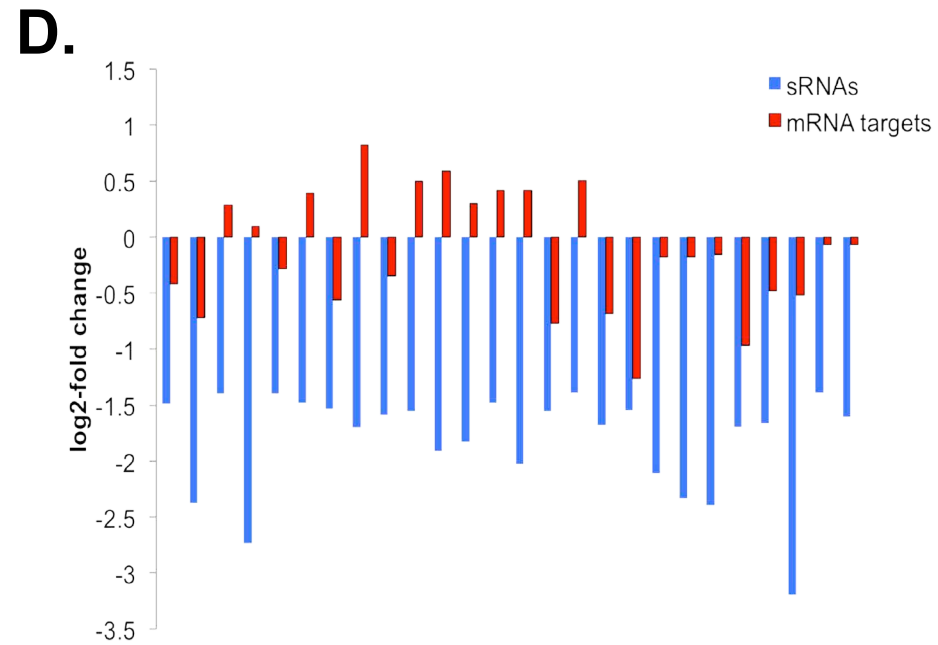

**Figure 4**

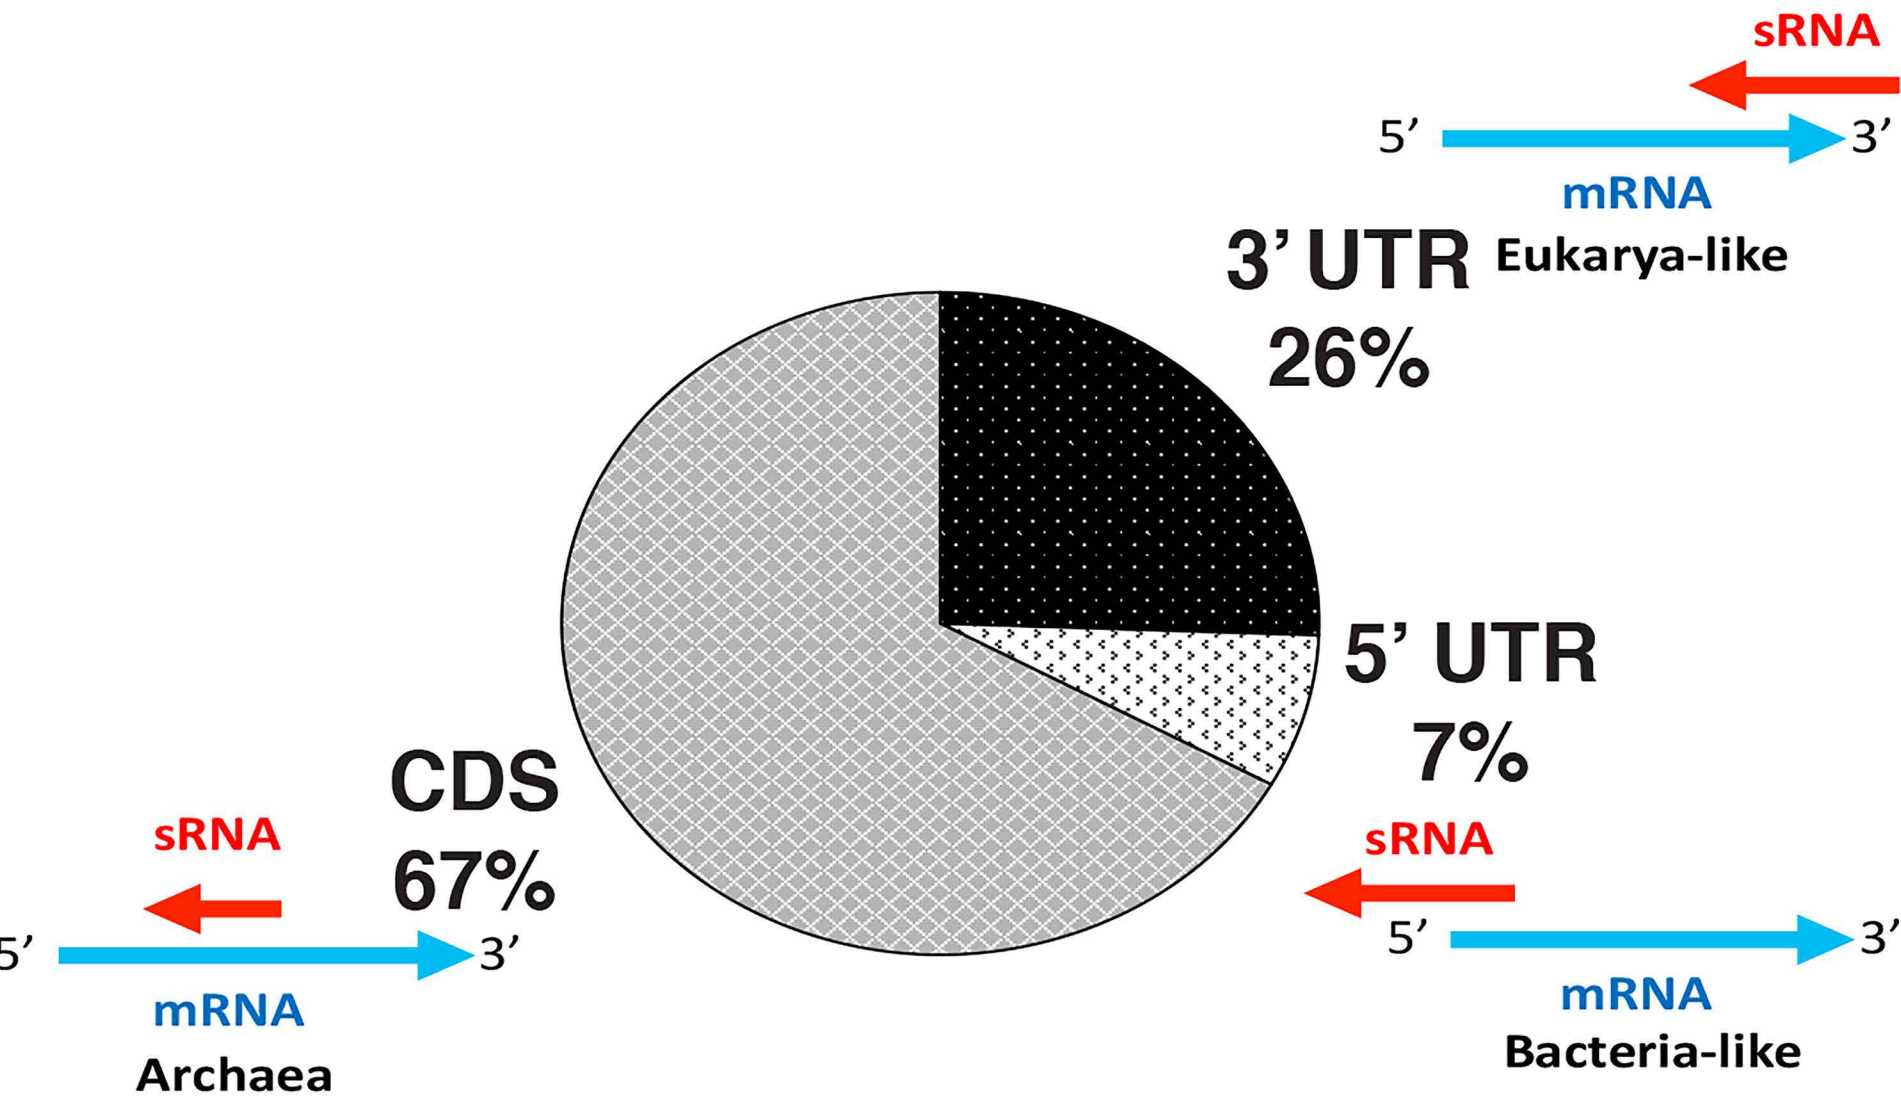

# Figure 5

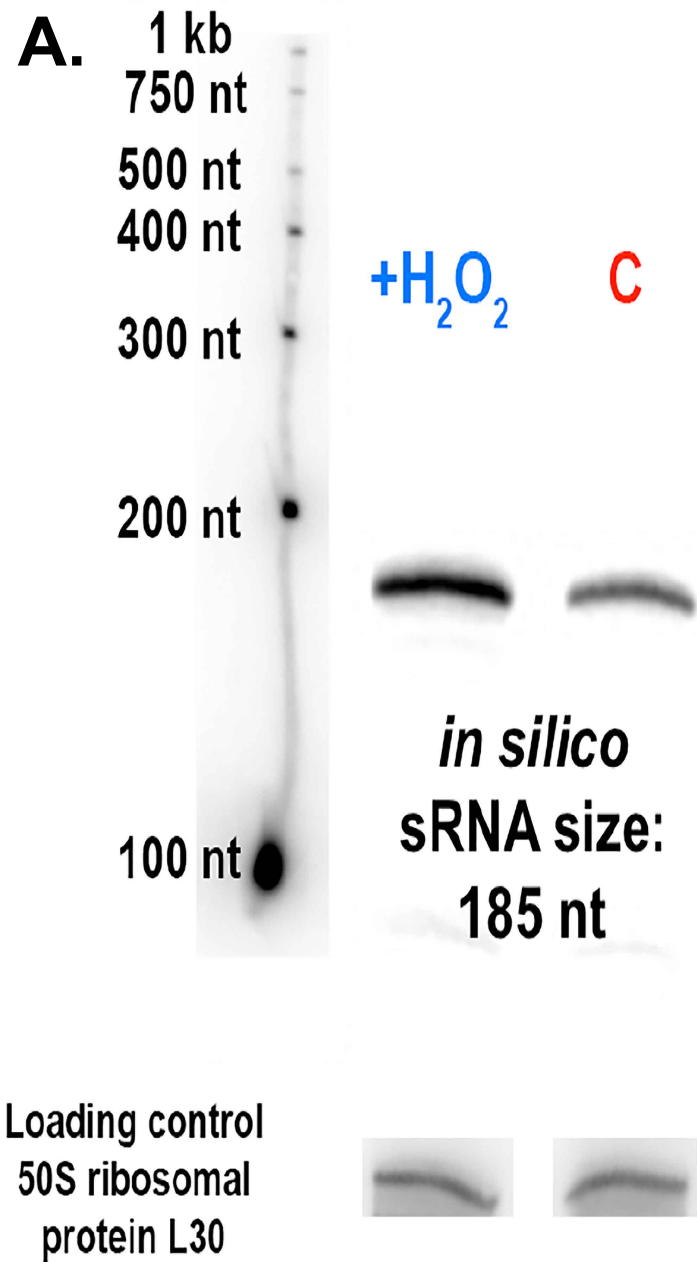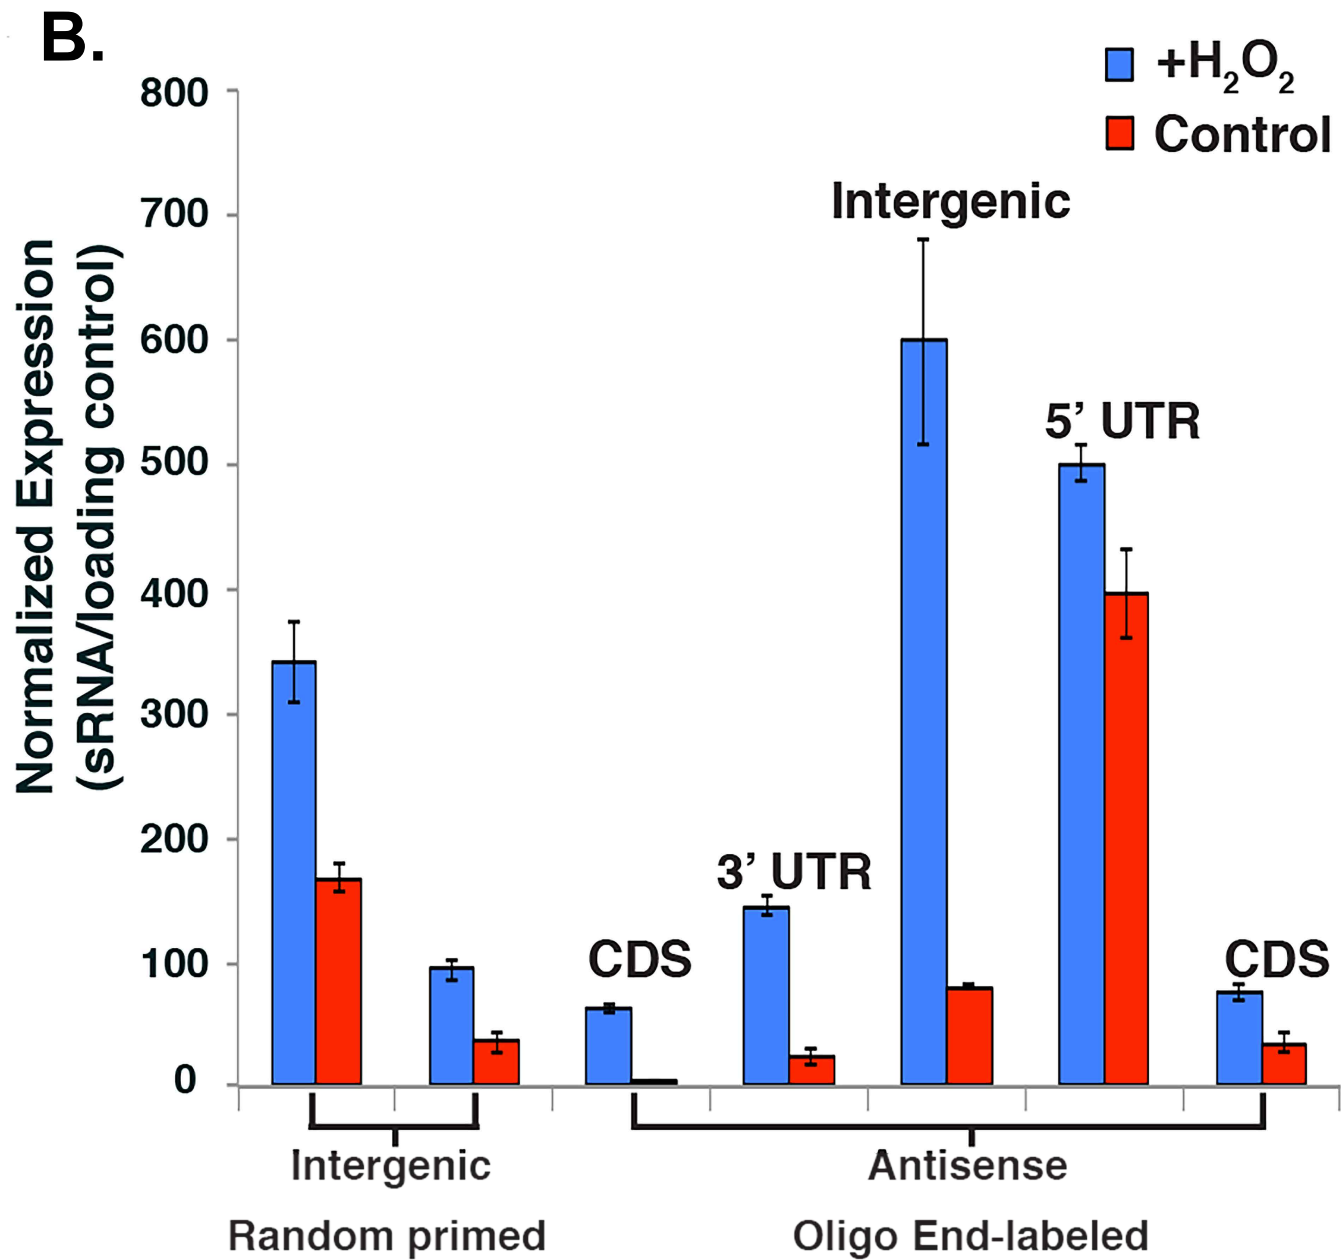

# Figure 6

**A.**

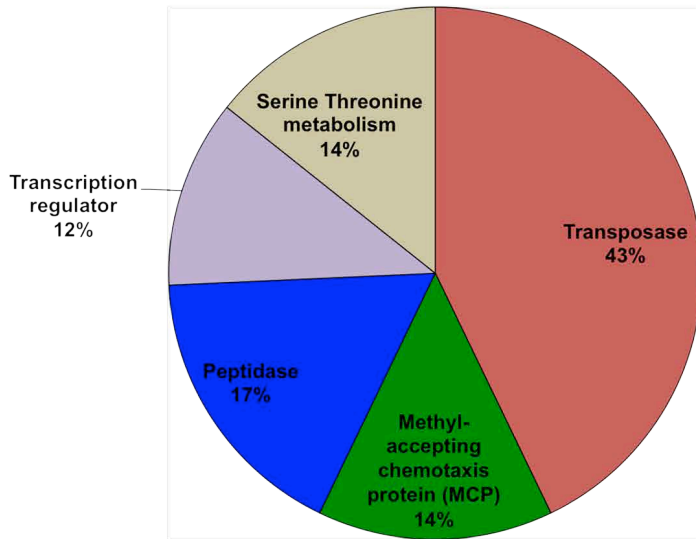

**B.**

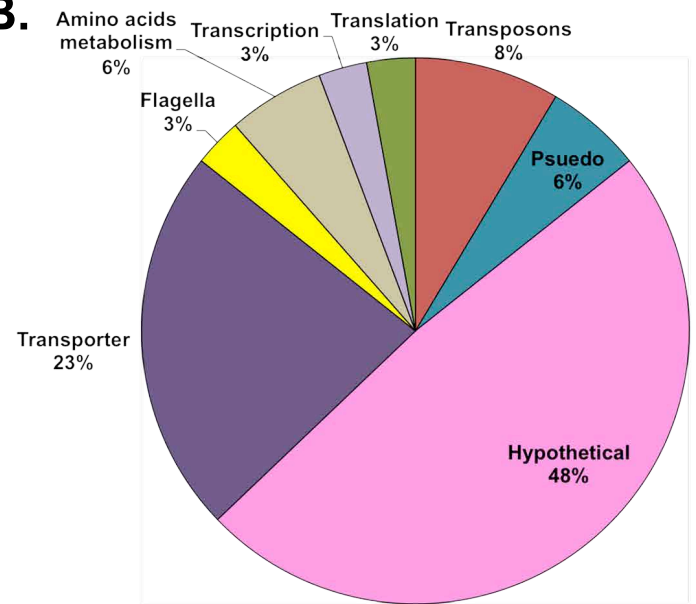



# Figure 7

A.

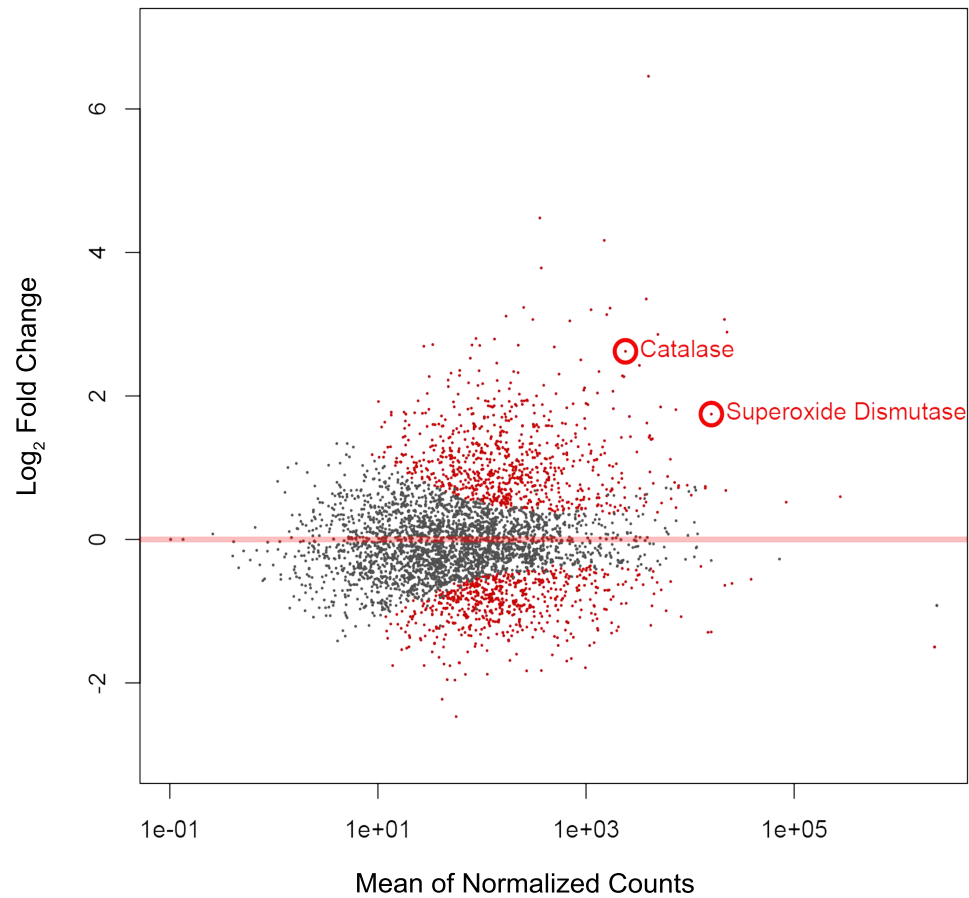

B.

| Up-regulated                           | Down-regulated                   |
|----------------------------------------|----------------------------------|
| Enriched Gene Ontology                 | Enriched Gene Ontology           |
| Transcription                          | Transposase                      |
| RNA-polymerase                         | Pyrrolo-quinoline quinone repeat |
| Iron Sulfur Cluster Assembly           | Methyltransferase                |
| DNA-repair                             | ABC transporters                 |
| Proteasome                             | Binding-dependent transport      |
| Transcription Regulator IclR           | ABC transporter complex          |
| Cell Redox Homeostasis                 | Ribosome                         |
| Histidine Catabolic Process            | Citrate Cycle (TCA cycle)        |
| Oxocarboxylic acid metabolism          | Iron-sulfur cluster binding      |
| Translation initiation factor activity | Chemotaxis                       |
